# Supplementary material for: Cherbonolides M and N from a Formosan Soft Coral Sarcophyton cherbonnieri
Source: MDPI journal article supplement (doi:10.3390/md19050260), 2021-05-01
Supplement: s1 [file s1]

# Cherbonolides M and N from a Formosan soft coral *Sarcophyton cherbonnieri*

Chia-Chi Peng <sup>1</sup>, Tzu-Yin Huang <sup>2</sup>, Chiung-Yao Huang <sup>1</sup>, Tsong-Long Hwang <sup>3,4,5</sup>, and Jyh-Horng Sheu <sup>1,2,6,7,\*</sup>

<sup>1</sup> Department of Marine Biotechnology and Resources, National Sun Yat-sen University, Kaohsiung 804, Taiwan; Chia-Chi.Peng@hki-jena.de (C.-C.P.); huangcy@mail.nsysu.edu.tw (C.-Y.H.)

<sup>2</sup> Doctoral Degree Program in Marine Biotechnology, National Sun Yat-sen University, Kaohsiung 804, Taiwan; HuangTY@g-mail.nsysu.edu.tw (T.-Y. H.)

<sup>3</sup> Graduate Institute of Natural Products, College of Medicine, Chang Gung University, Taoyuan 333, Taiwan; htl@mail.cgu.edu.tw (T.-L. H.)

<sup>4</sup> Research Center for Industry of Human Ecology and Graduate Institute of Health Industry Technology, Chang Gung University of Science and Technology, Taoyuan 333, Taiwan

<sup>5</sup> Department of Anesthesiology, Chang Gung Memorial Hospital, Taoyuan 333, Taiwan

<sup>6</sup> Graduate Institute of Natural Products, Kaohsiung Medical University, Kaohsiung 807, Taiwan

<sup>7</sup> Department of Medical Research, China Medical University Hospital, China Medical University, Taichung 404, Taiwan

\* Correspondence: sheu@mail.nsysu.edu.tw; Tel.: +886-7-525-2000 (ext. 5030); Fax: +886-7-525-5020

## List of Figures

|                                                                                                                    |    |
|--------------------------------------------------------------------------------------------------------------------|----|
| Figure S1: ESIMS spectrum of <b>1</b> .....                                                                        | 1  |
| Figure S2: HRESIMS spectrum of <b>1</b> .....                                                                      | 1  |
| Figure S3: IR spectrum of <b>1</b> .....                                                                           | 2  |
| Figure S4: CD spectrum ( $1.2 \times 10^{-4}$ M, MeOH) of <b>1</b> .....                                           | 2  |
| Figure S5: $^1\text{H}$ NMR spectrum of <b>1</b> in acetone- $d_6$ at 400 MHz.....                                 | 3  |
| Figure S6: $^1\text{H}$ NMR spectrum (from 0.9 to 2.9 ppm) of <b>1</b> in acetone- $d_6$ at 400 MHz .....          | 4  |
| Figure S7: $^{13}\text{C}$ NMR spectrum of <b>1</b> in acetone- $d_6$ at 100 MHz .....                             | 5  |
| Figure S8: DEPT spectrum of <b>1</b> in acetone- $d_6$ .....                                                       | 6  |
| Figure S9: HSQC spectrum of <b>1</b> in acetone- $d_6$ .....                                                       | 7  |
| Figure S10: COSY spectrum of <b>1</b> in acetone- $d_6$ .....                                                      | 8  |
| Figure S11: HMBC spectrum of <b>1</b> in acetone- $d_6$ .....                                                      | 9  |
| Figure S12: NOESY spectrum of <b>1</b> in acetone- $d_6$ .....                                                     | 10 |
| Figure S13: $^1\text{H}$ NMR spectrum of <b>1</b> in $\text{C}_6\text{D}_6$ at 500 MHz .....                       | 11 |
| Figure S14: $^1\text{H}$ NMR spectrum (from 0.6 to 2.5 ppm) of <b>1</b> in $\text{C}_6\text{D}_6$ at 500 MHz ..... | 12 |
| Figure S15: $^{13}\text{C}$ NMR spectrum of <b>1</b> in $\text{C}_6\text{D}_6$ at 125 MHz .....                    | 13 |
| Figure S16: DEPT spectrum of <b>1</b> in $\text{C}_6\text{D}_6$ .....                                              | 14 |
| Figure S17: HSQC spectrum of <b>1</b> in $\text{C}_6\text{D}_6$ .....                                              | 15 |
| Figure S18: COSY spectrum of <b>1</b> in $\text{C}_6\text{D}_6$ .....                                              | 16 |
| Figure S19: HMBC spectrum of <b>1</b> in $\text{C}_6\text{D}_6$ .....                                              | 17 |
| Figure S20: NOESY spectrum of <b>1</b> in $\text{C}_6\text{D}_6$ .....                                             | 18 |
| Figure S21: ESIMS spectrum of <b>2</b> .....                                                                       | 19 |
| Figure S22: HRESIMS spectrum of <b>2</b> .....                                                                     | 19 |
| Figure S23: IR spectrum of <b>2</b> .....                                                                          | 20 |
| Figure S24: CD spectrum ( $1.2 \times 10^{-4}$ M, MeOH) of <b>2</b> .....                                          | 20 |
| Figure S25: $^1\text{H}$ NMR spectrum of <b>2</b> in $\text{C}_6\text{D}_6$ at 400 MHz .....                       | 21 |

|                                                                                                                    |    |
|--------------------------------------------------------------------------------------------------------------------|----|
| Figure S26: $^1\text{H}$ NMR spectrum (from 0.8 to 3.2 ppm) of <b>2</b> in $\text{C}_6\text{D}_6$ at 400 MHz ..... | 22 |
| Figure S27: $^{13}\text{C}$ NMR spectrum of <b>2</b> in acetone- $d_6$ at 100 MHz .....                            | 23 |
| Figure S28: DEPT spectrum of <b>2</b> .....                                                                        | 24 |
| Figure S29: HSQC spectrum of <b>2</b> .....                                                                        | 25 |
| Figure S30: COSY spectrum of <b>2</b> .....                                                                        | 26 |
| Figure S31: HMBC spectrum of <b>2</b> .....                                                                        | 27 |
| Figure S32: NOESY spectrum of <b>2</b> .....                                                                       | 28 |
| Figure S33: CD spectrum ( $1.6 \times 10^{-4}$ M, MeOH) of isosarcophine ( <b>3</b> ) .....                        | 29 |

## Spectroscopic data of cherbonolide M (1)

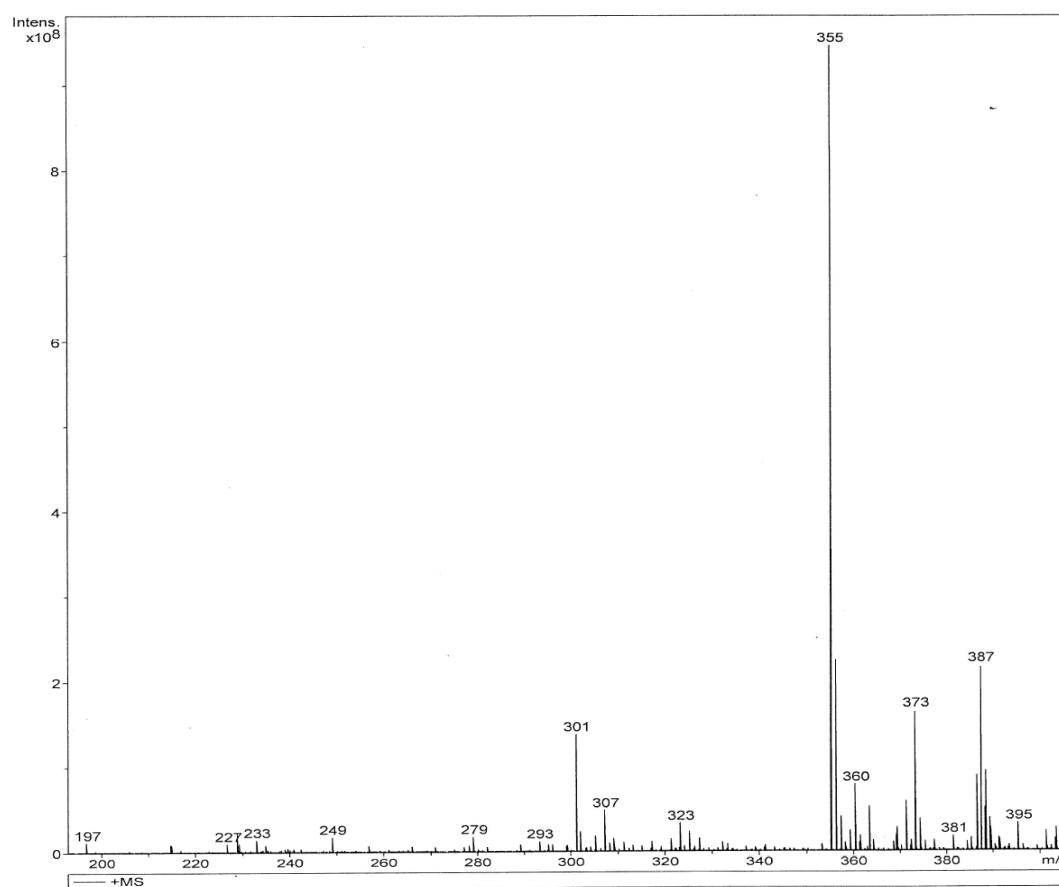

Figure S1: ESIMS spectrum of 1

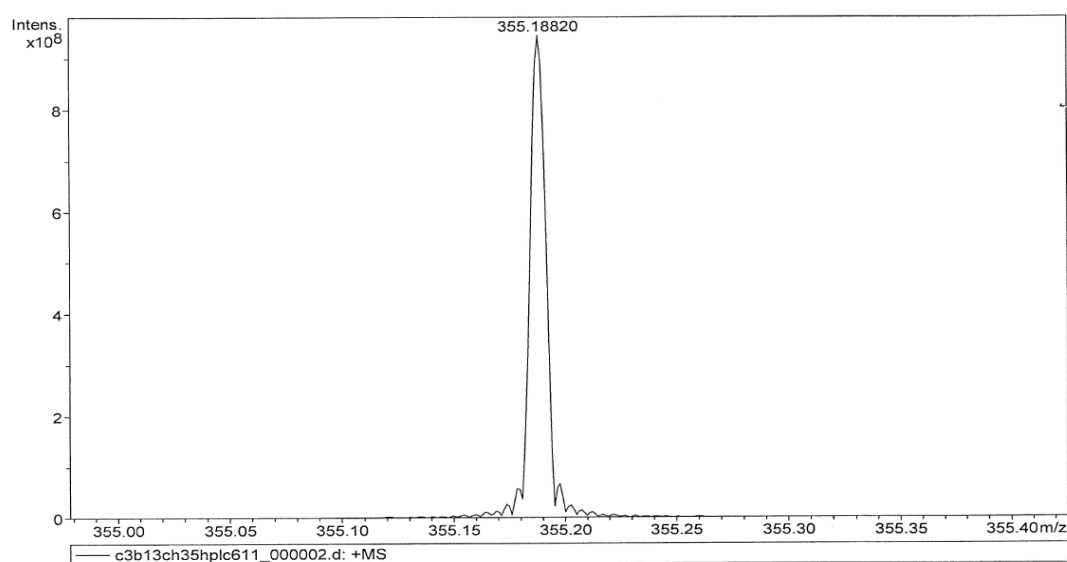

| Meas. m/z | # | Formula                                          | Score  | m/z       | err [mDa] | err [ppm] | mSigma | rdb | e <sup>-</sup> | Conf | N-Rule |
|-----------|---|--------------------------------------------------|--------|-----------|-----------|-----------|--------|-----|----------------|------|--------|
| 355.18820 | 1 | C <sub>20</sub> H <sub>28</sub> NaO <sub>4</sub> | 100.00 | 355.18798 | -0.22     | -0.63     | 14.9   | 6.5 | even           |      | ok     |

Figure S2: HRESIMS spectrum of 1

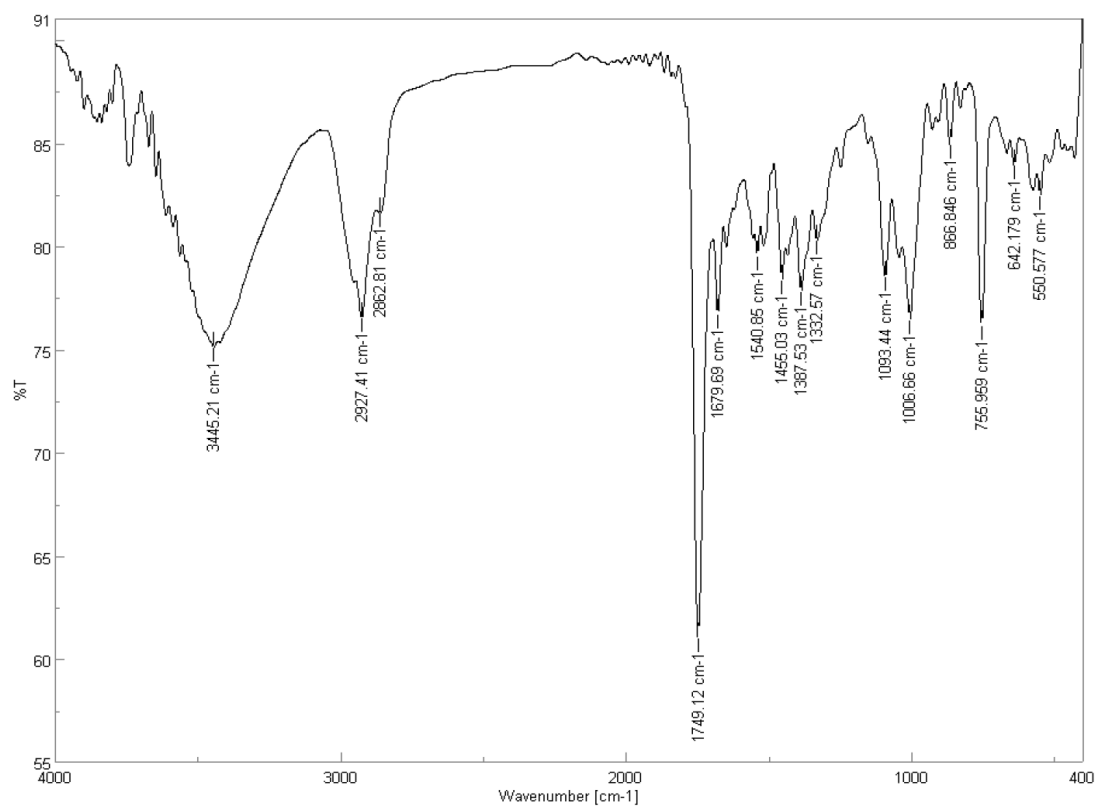

Figure S3: IR spectrum of 1

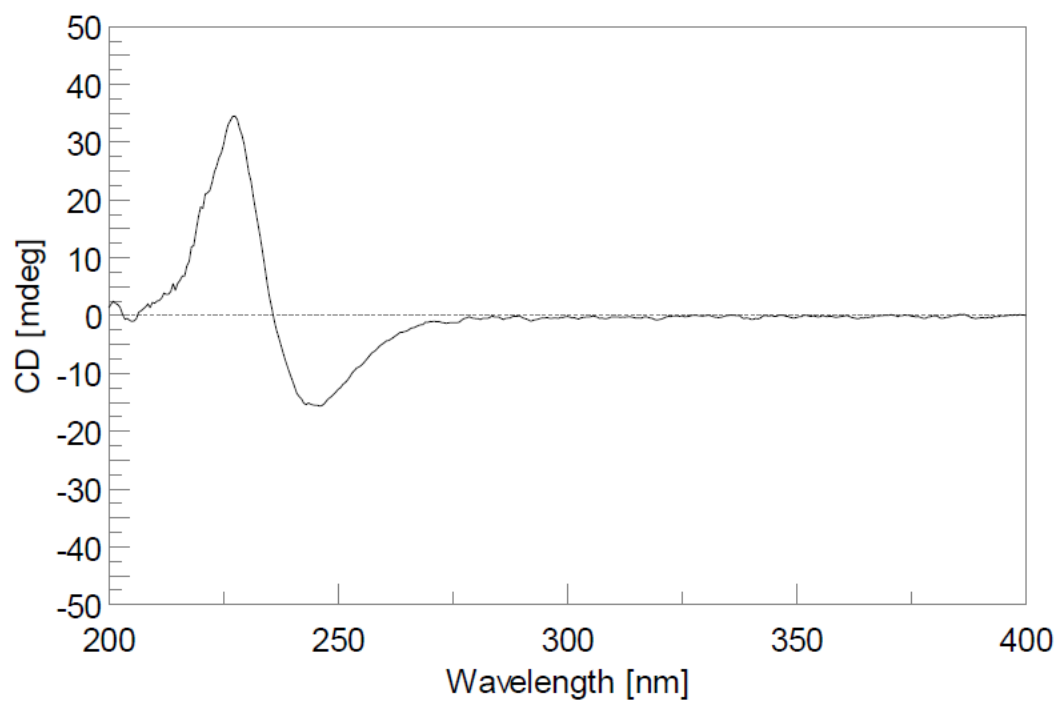

Figure S4: CD spectrum ( $1.2 \times 10^{-4}$  M, MeOH) of 1

PROTON\_01  
c3b-13-LH3-5-61.9

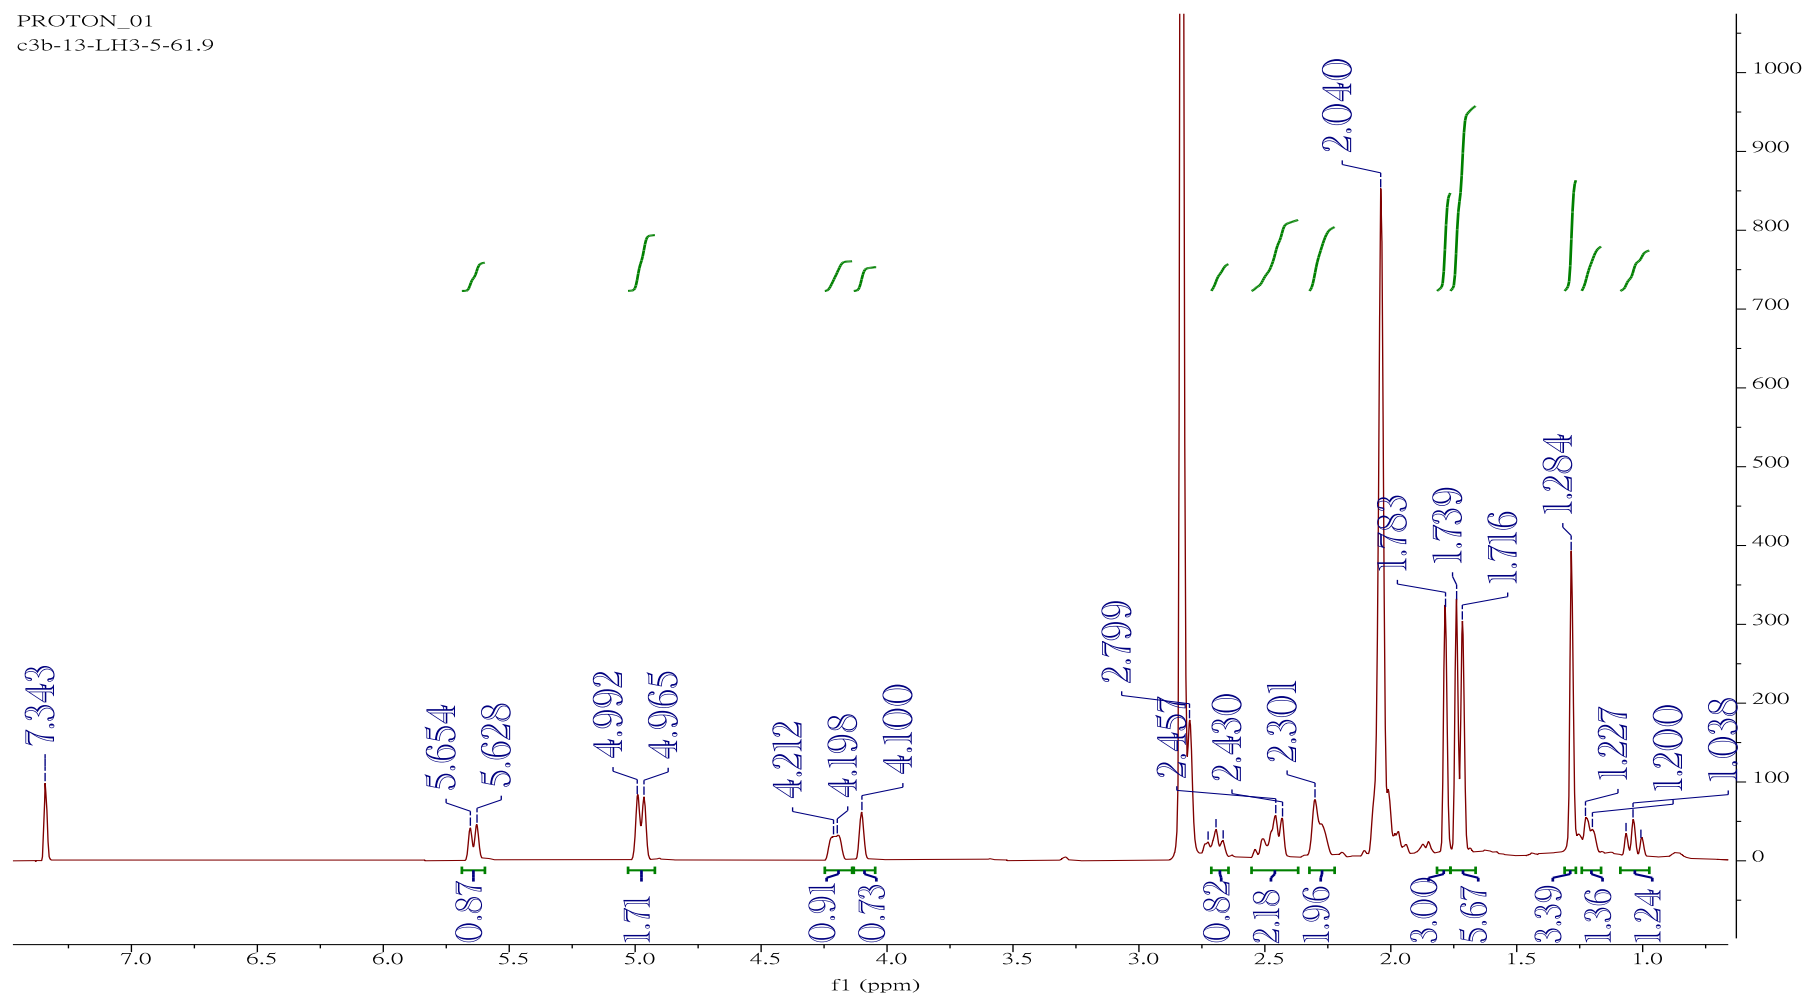

Figure S5:  $^1\text{H}$  NMR spectrum of **1** in acetone- $d_6$  at 400 MHz

PROTON\_01  
c3b-13-LH3-5-61.9

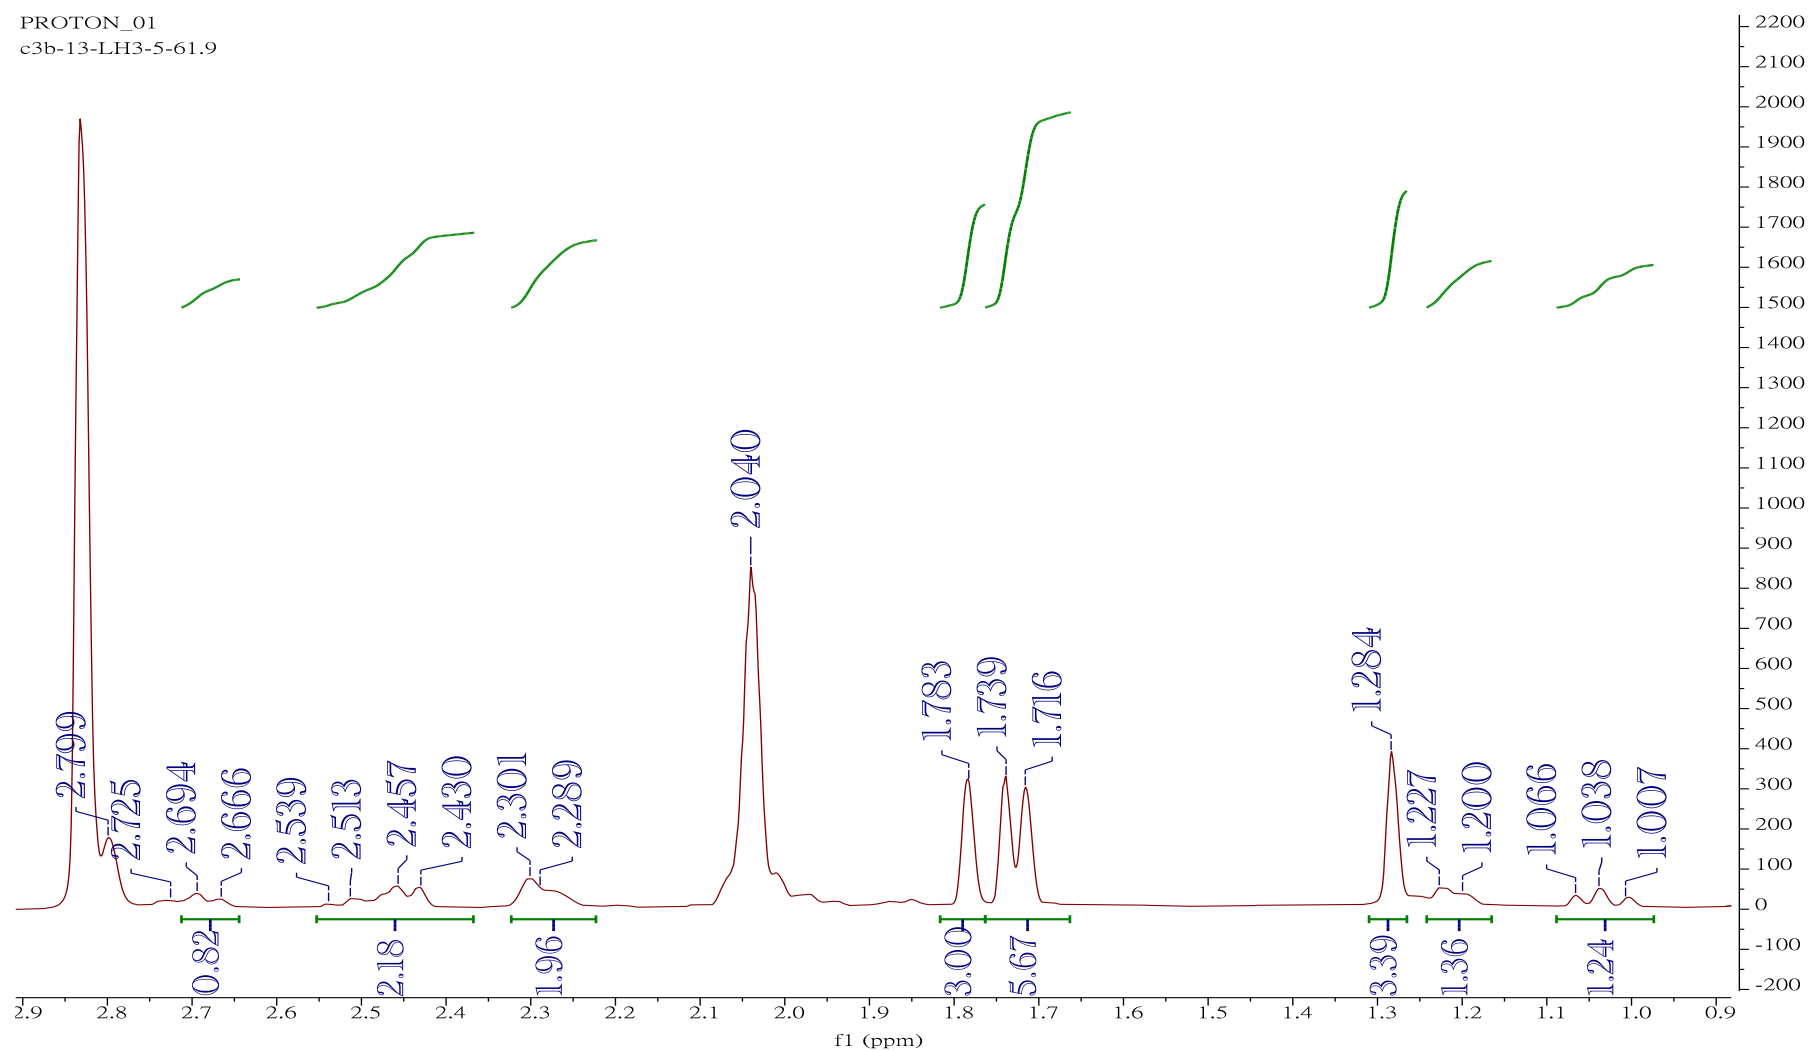

Figure S6:  $^1\text{H}$  NMR spectrum (from 0.9 to 2.9 ppm) of **1** in acetone- $d_6$  at 400 MHz

CARBON\_01  
c3b-13-LH3-5-61.9

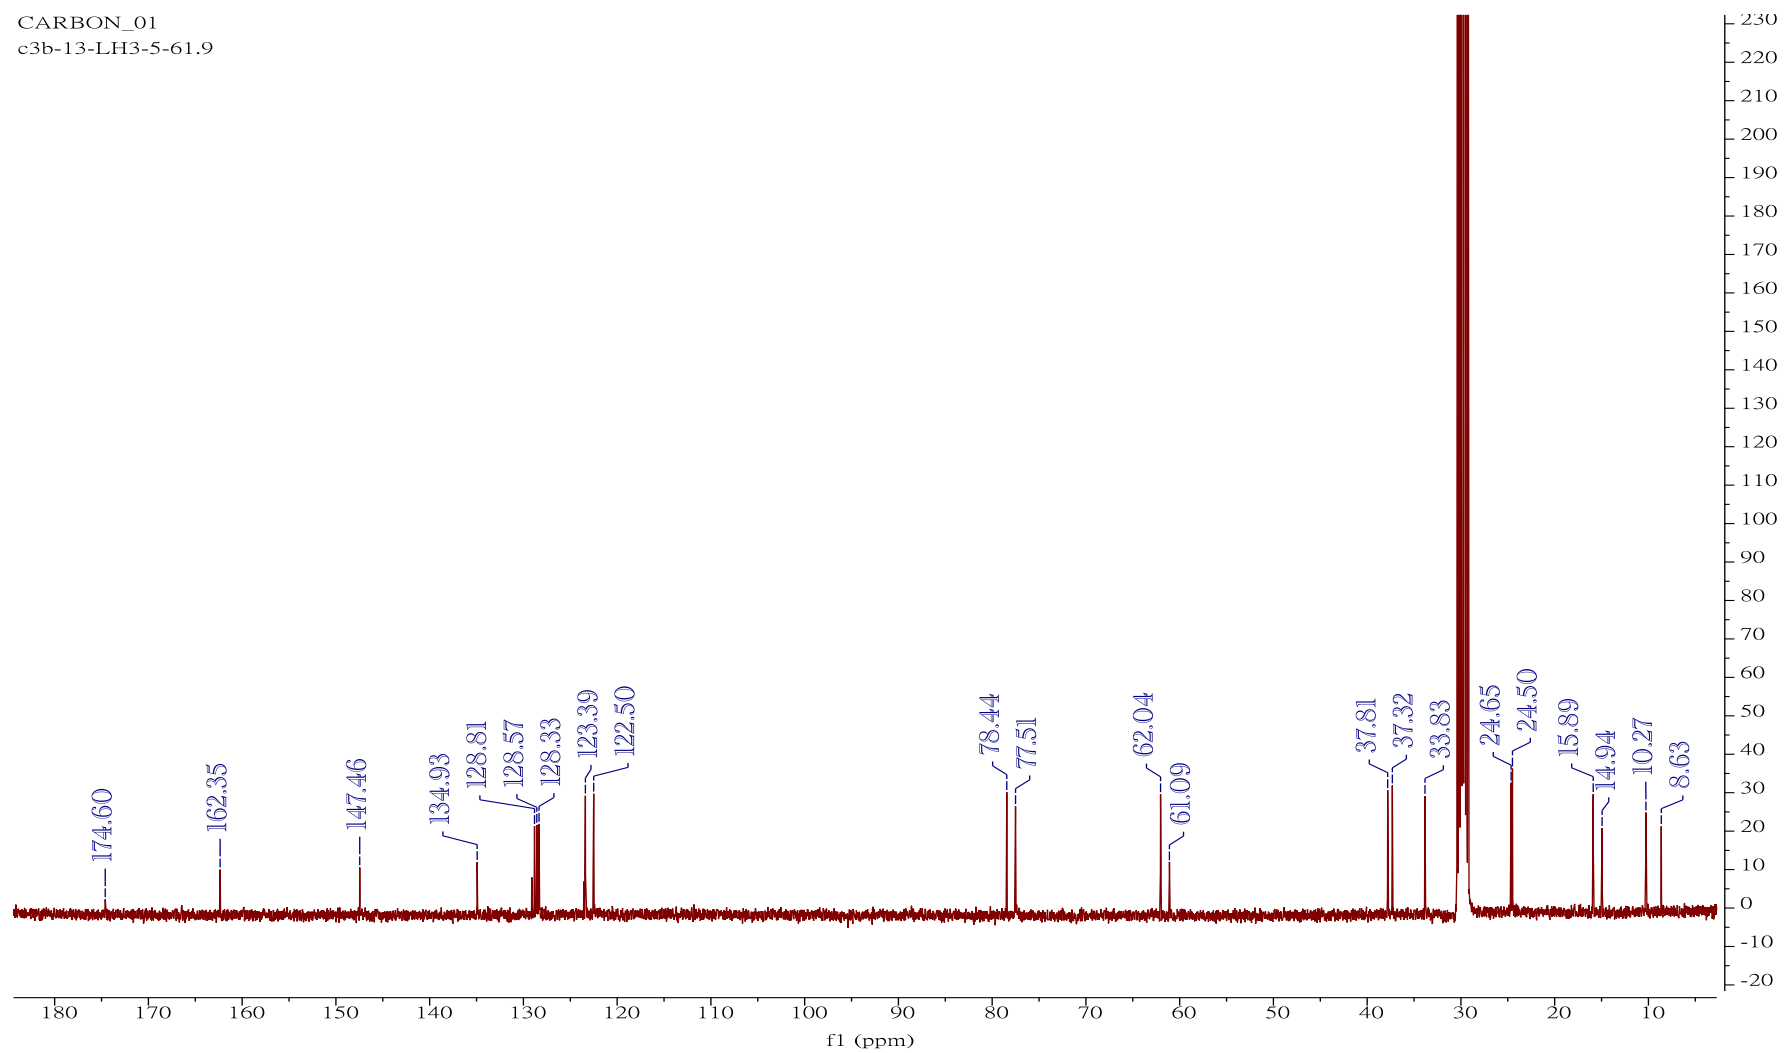

Figure S7: <sup>13</sup>C NMR spectrum of **1** in acetone-*d*<sub>6</sub> at 100 MHz



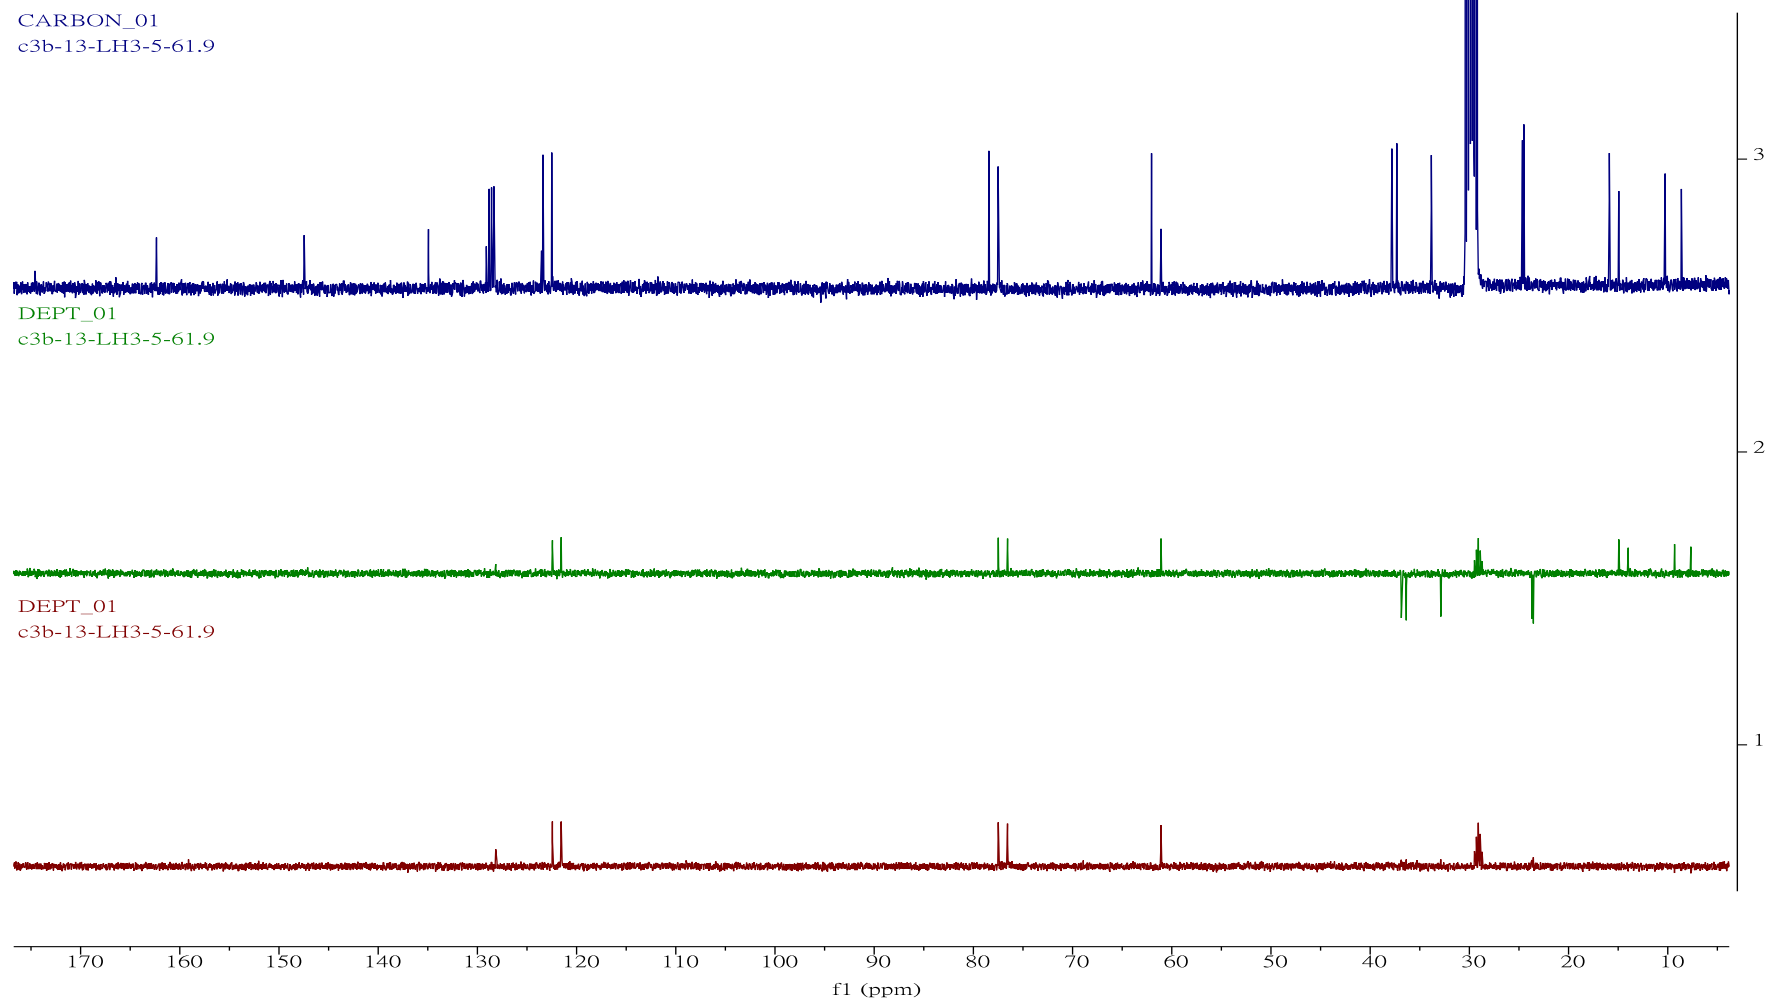

Figure S8: DEPT spectrum of **1** in acetone- $d_6$

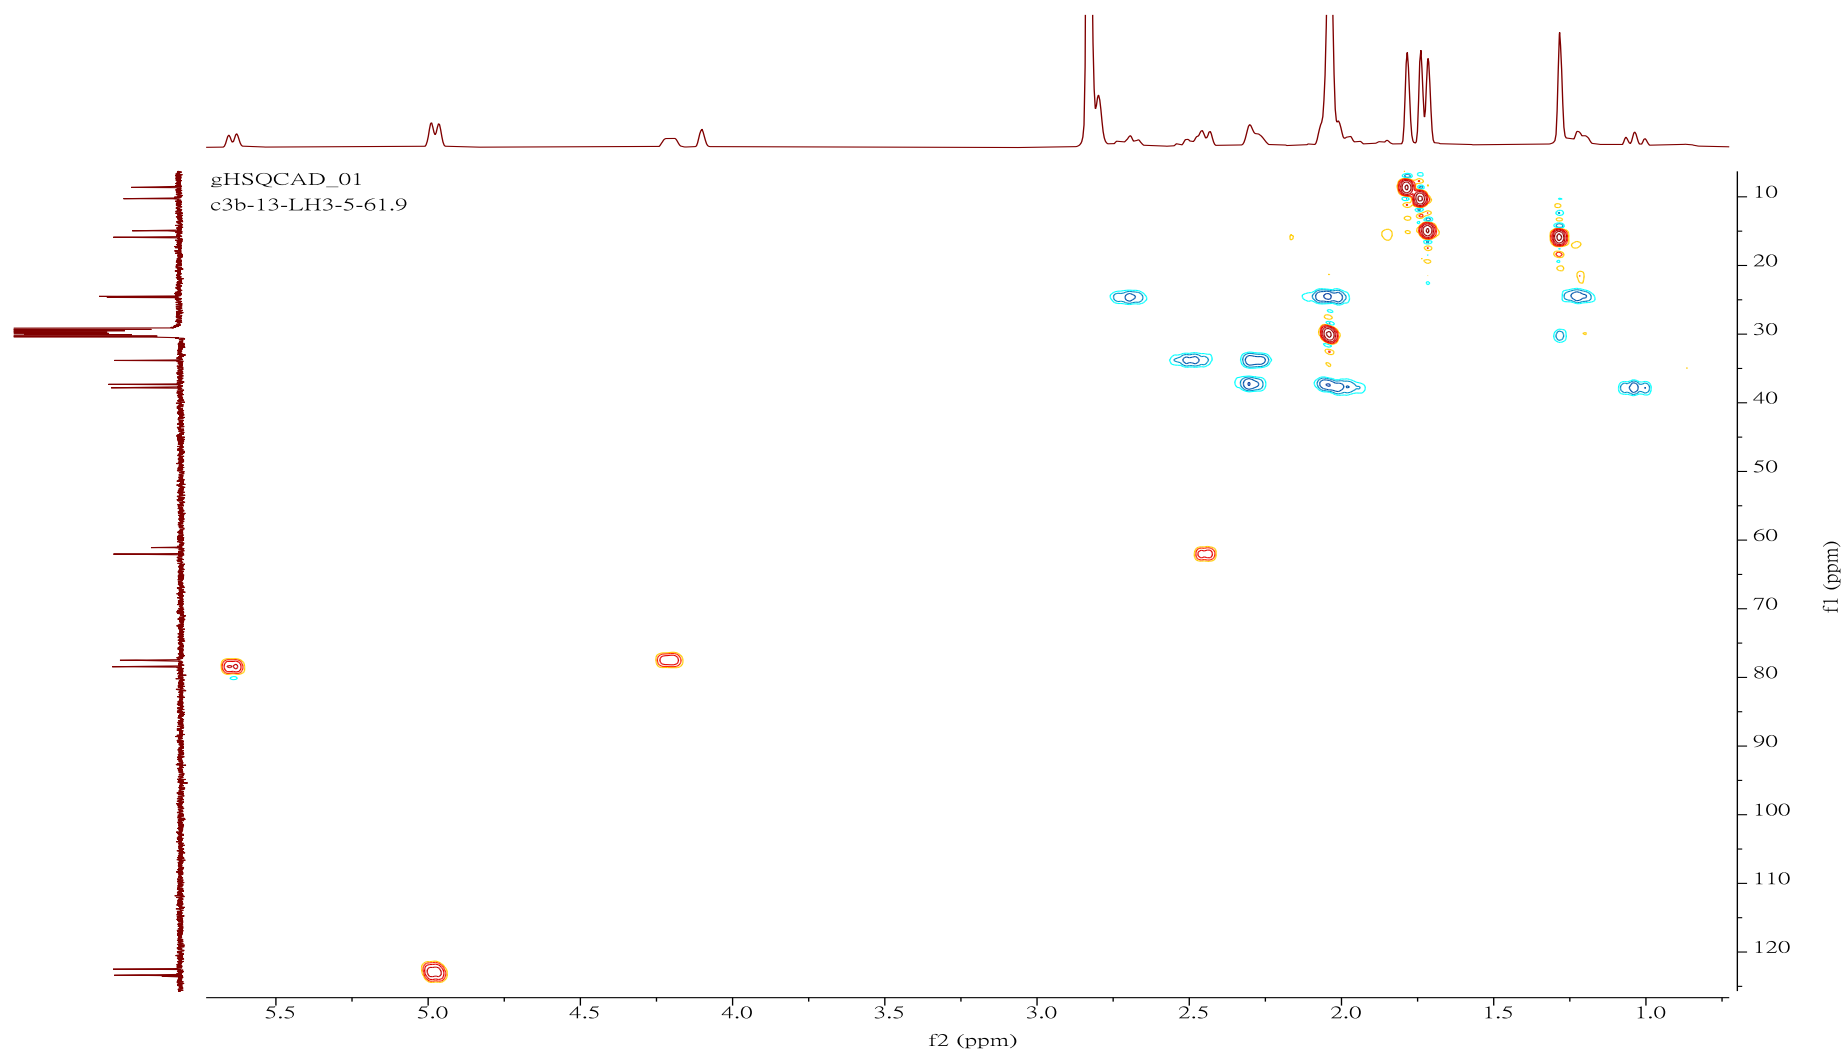

Figure S9: HSQC spectrum of **1** in acetone- $d_6$

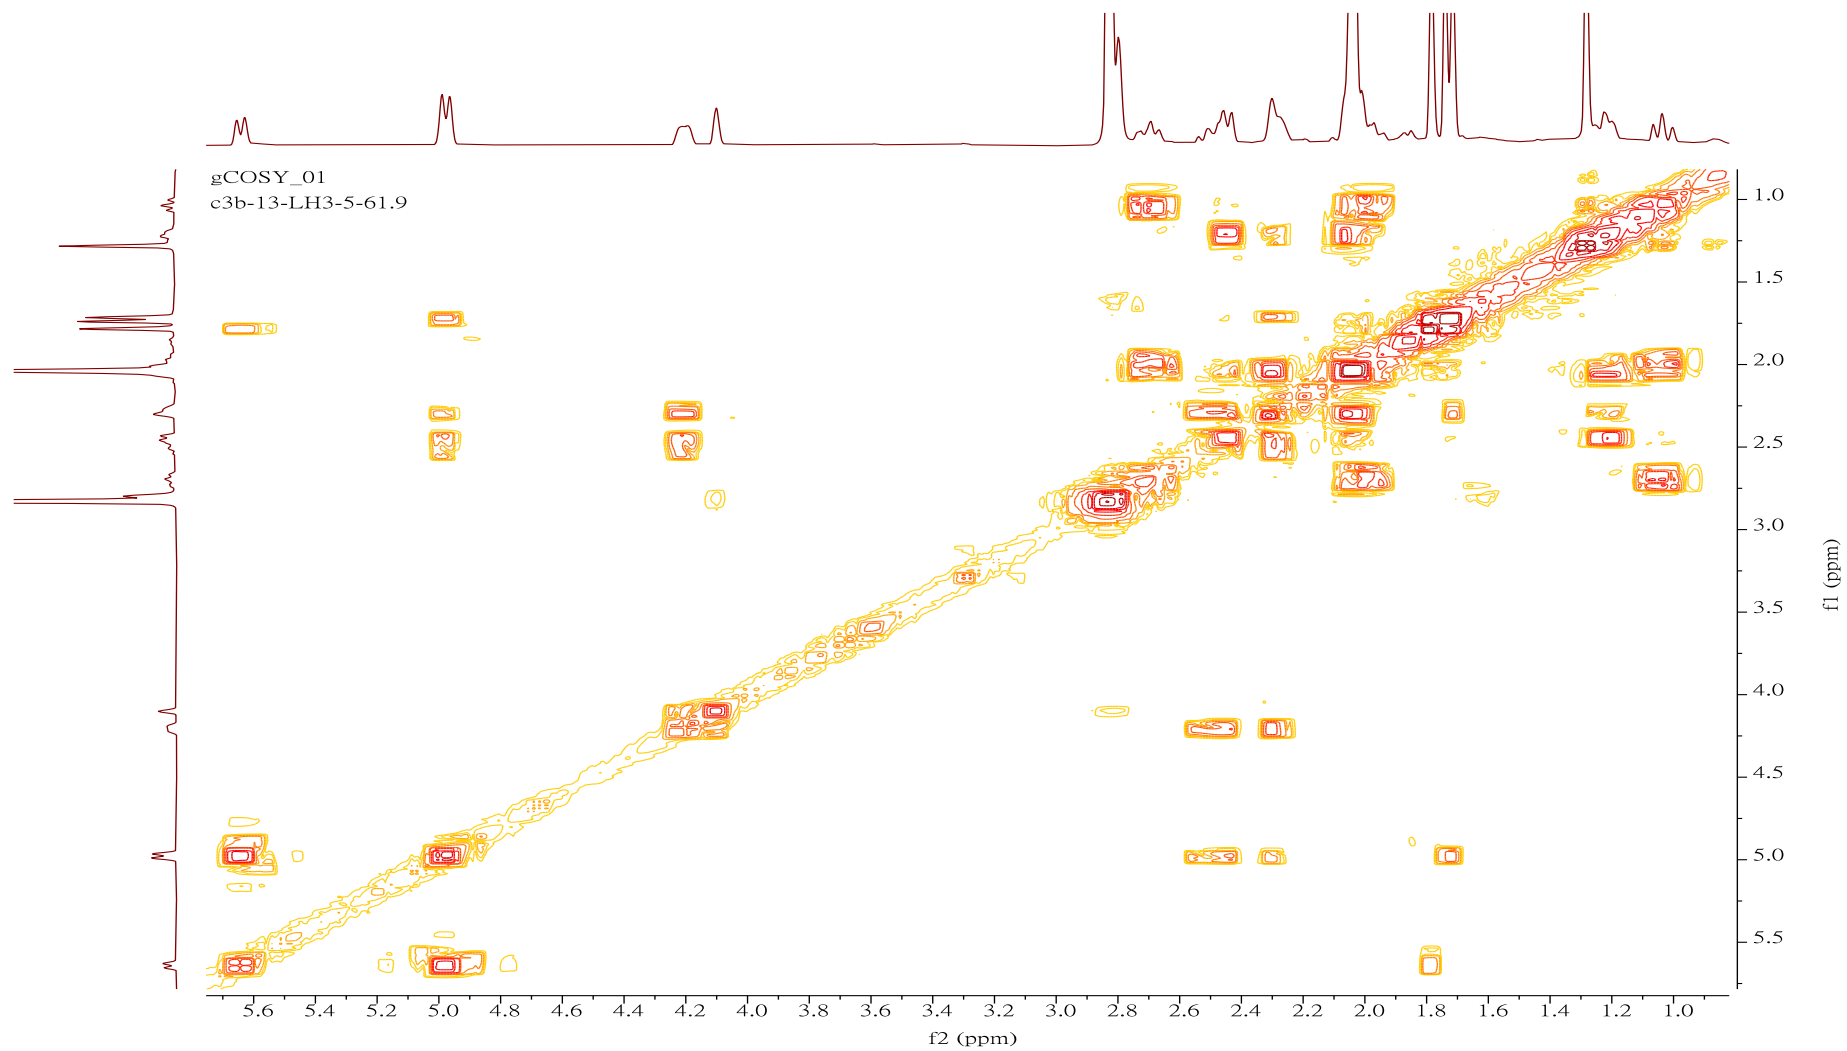

Figure S10: COSY spectrum of **1** in acetone- $d_6$

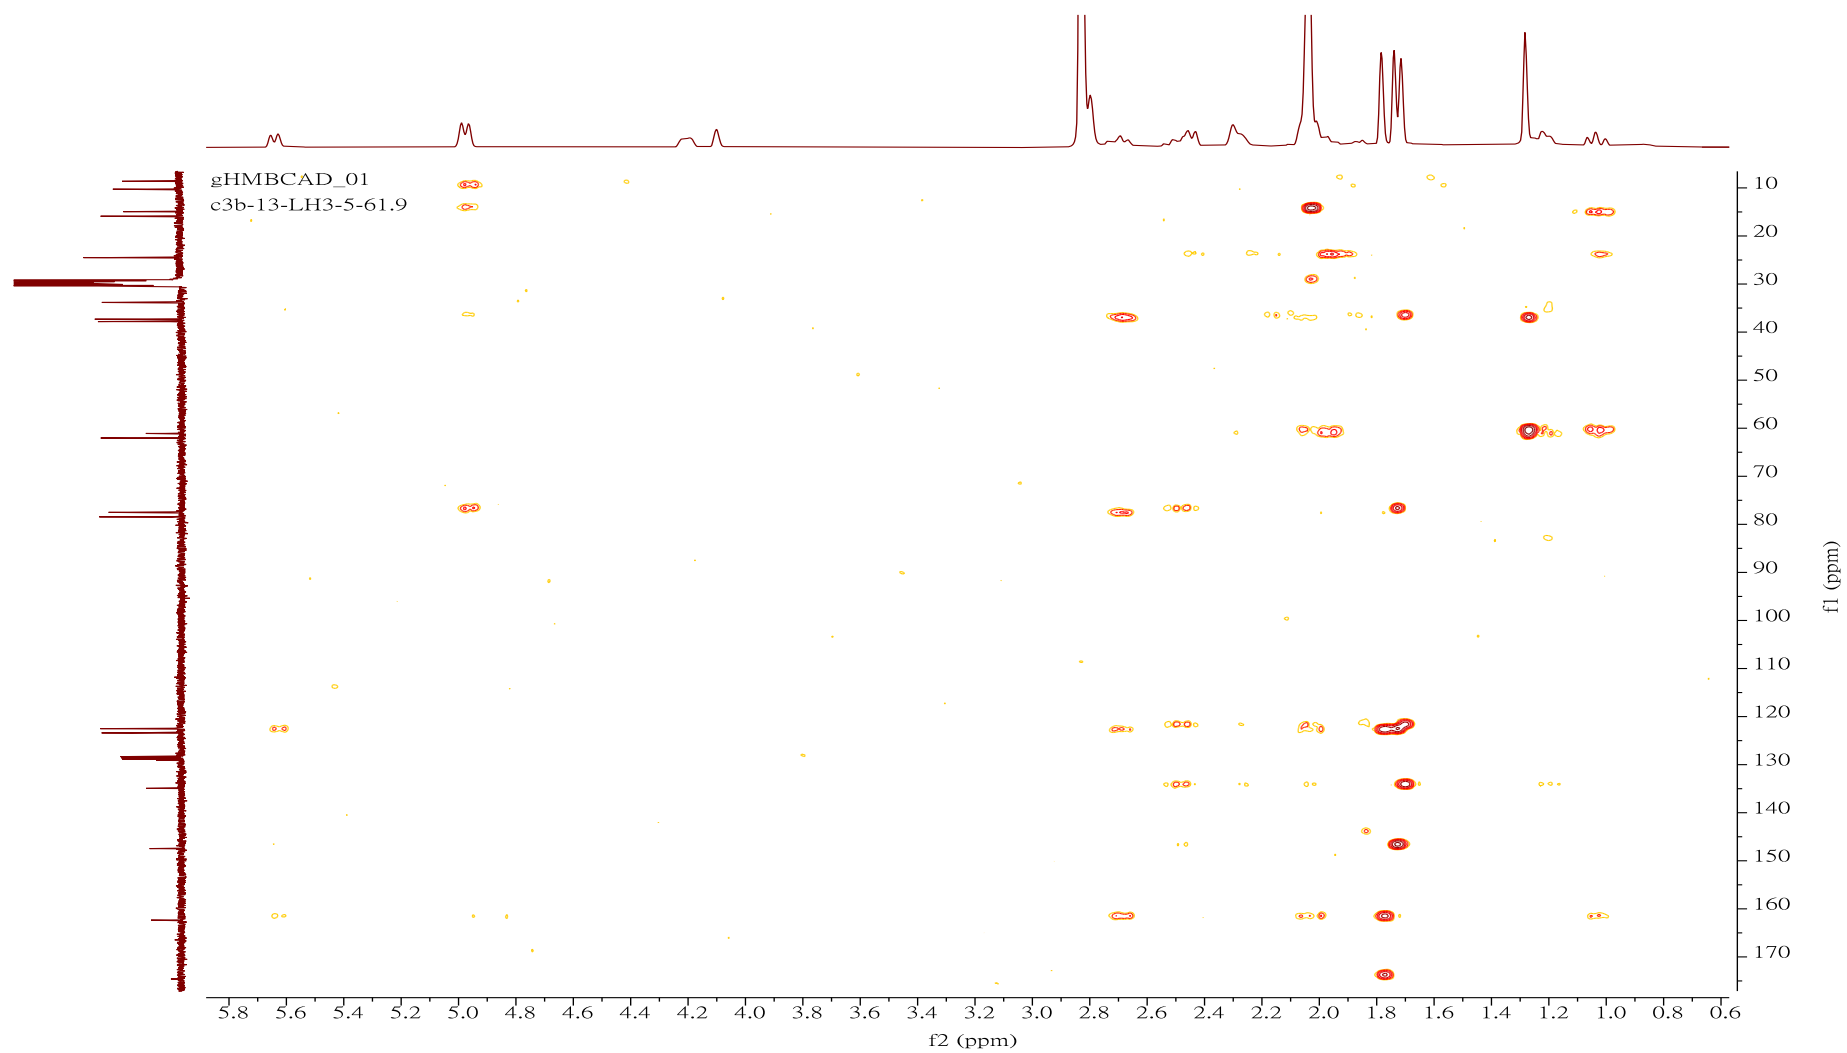

Figure S11: HMBC spectrum of **1** in acetone- $d_6$

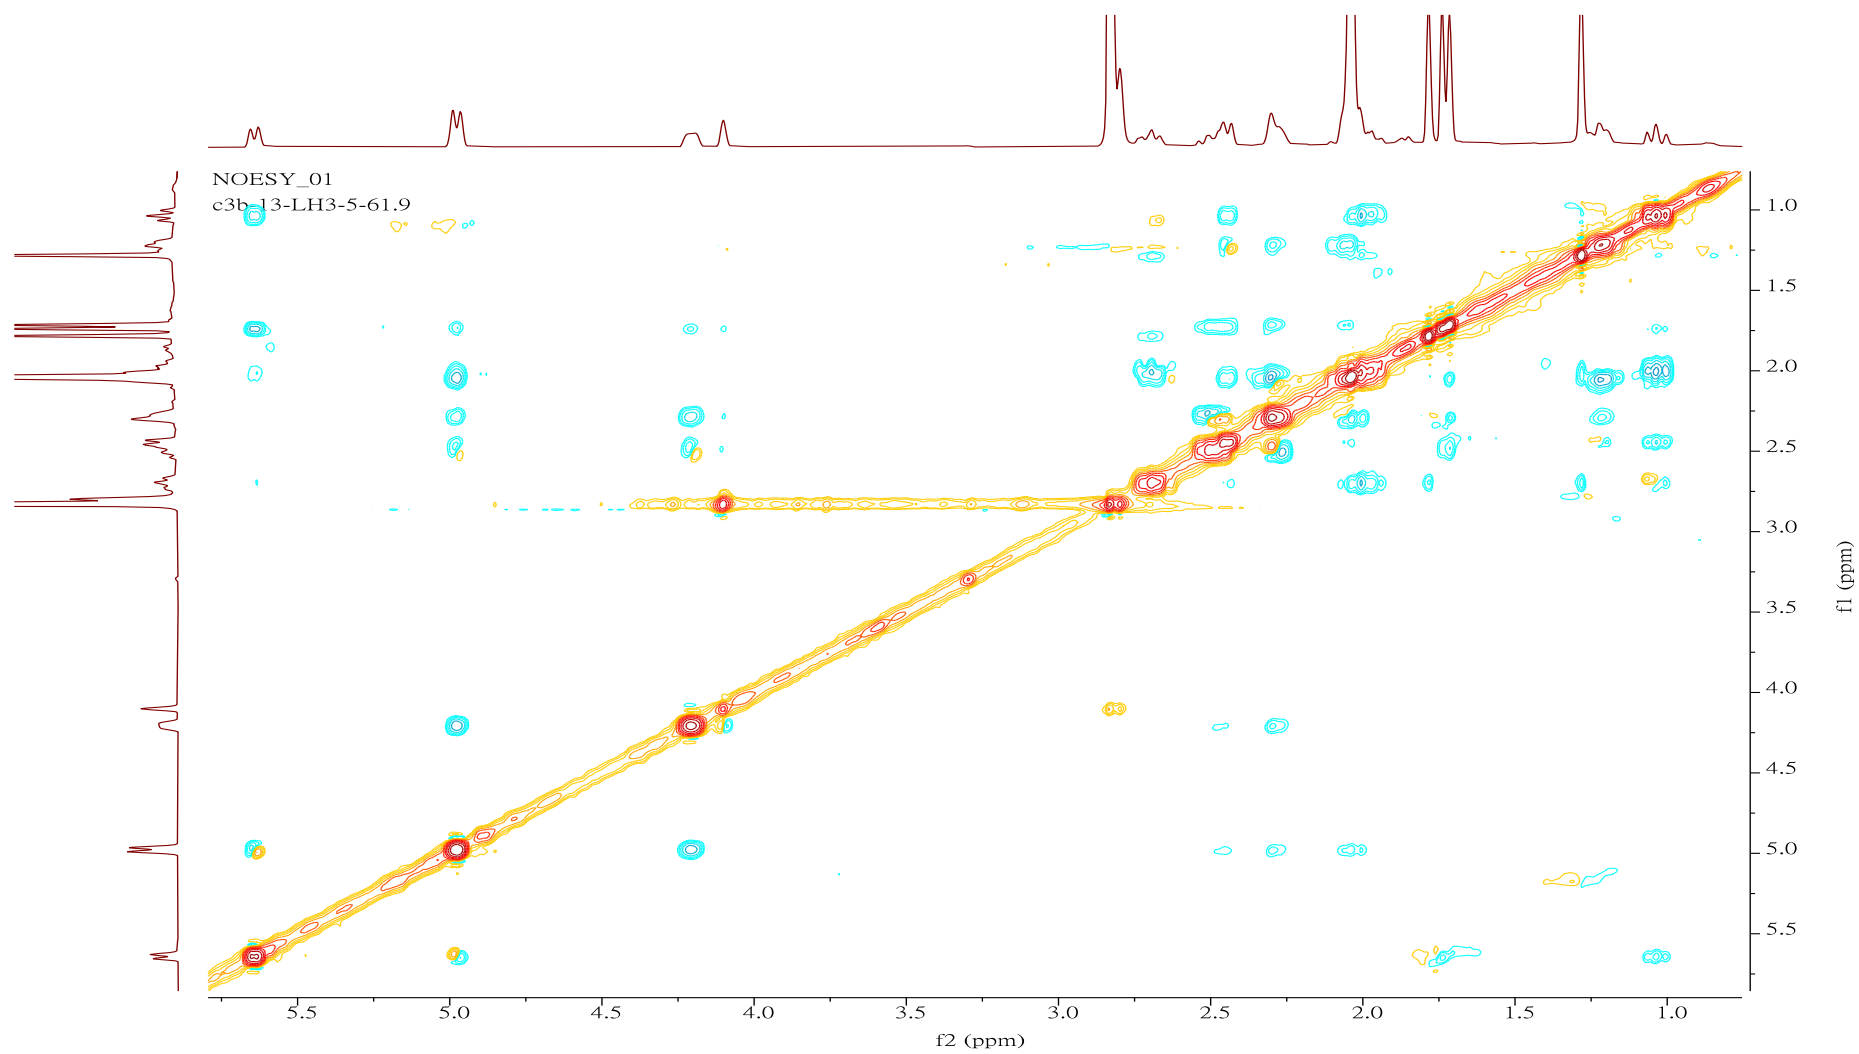

Figure S12: NOESY spectrum of **1** in acetone- $d_6$

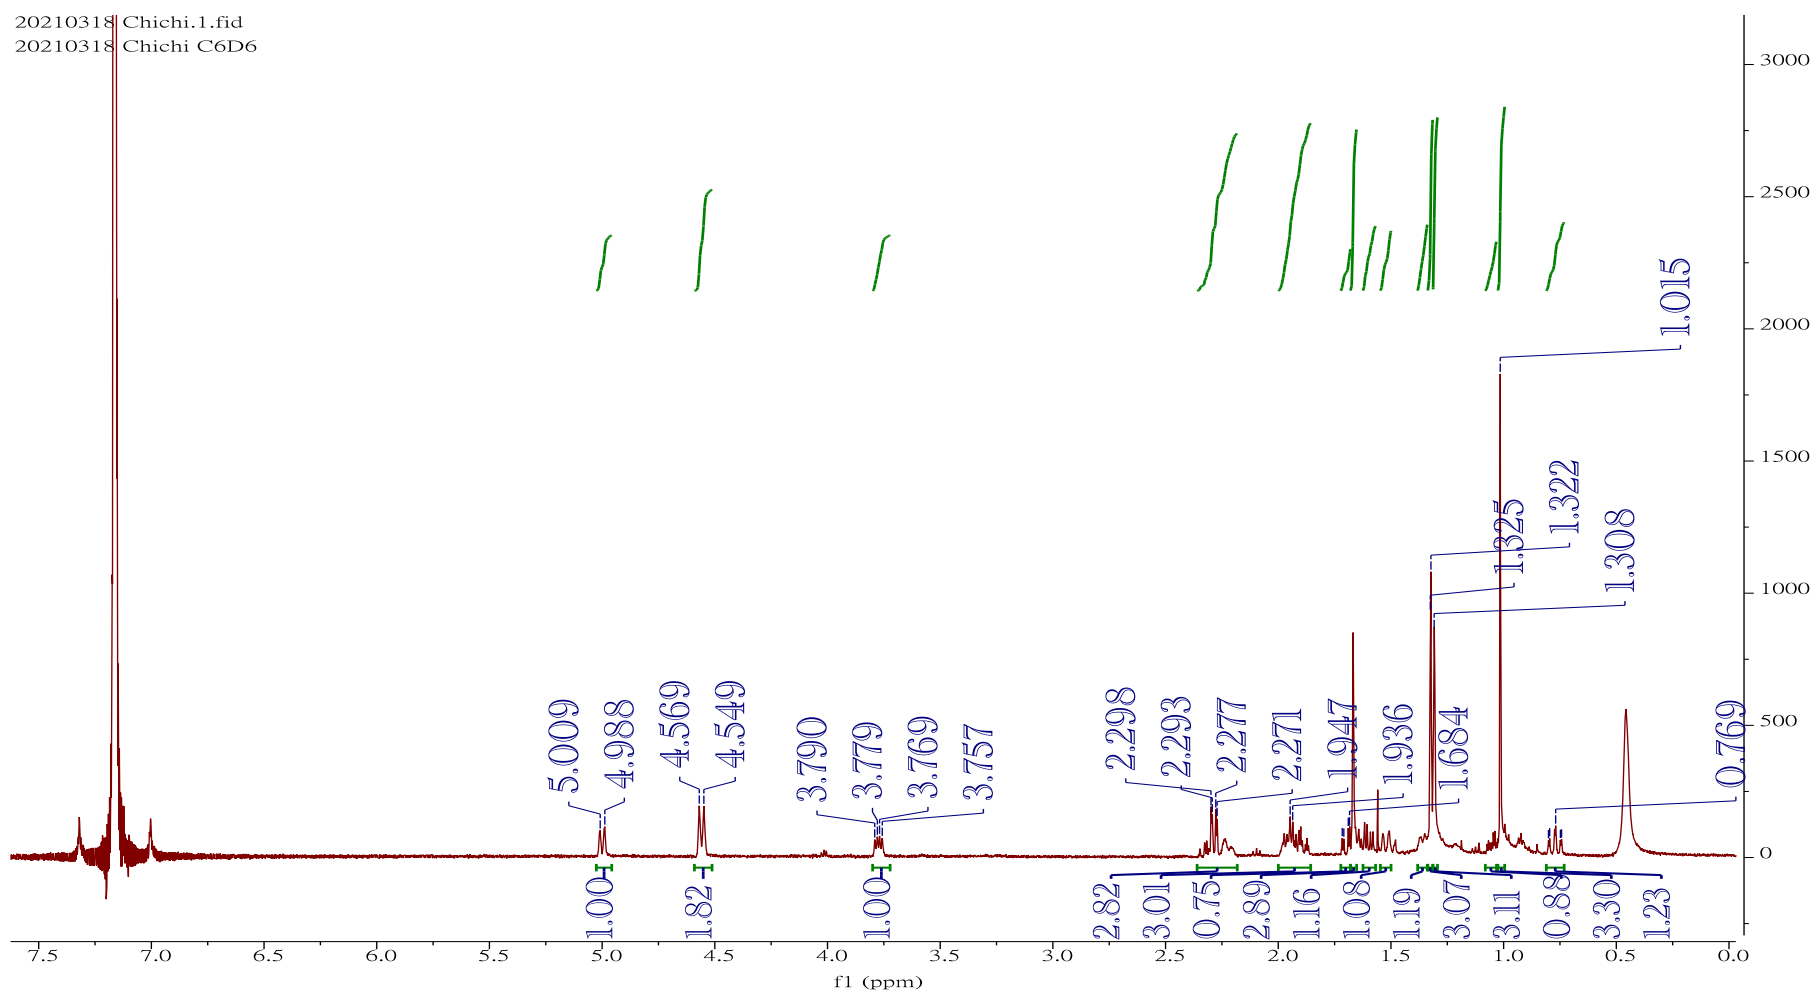

Figure S13:  $^1\text{H}$  NMR spectrum of **1** in  $\text{C}_6\text{D}_6$  at 500 MHz

20210318 Chichi.1.fid  
20210318 Chichi C6D6

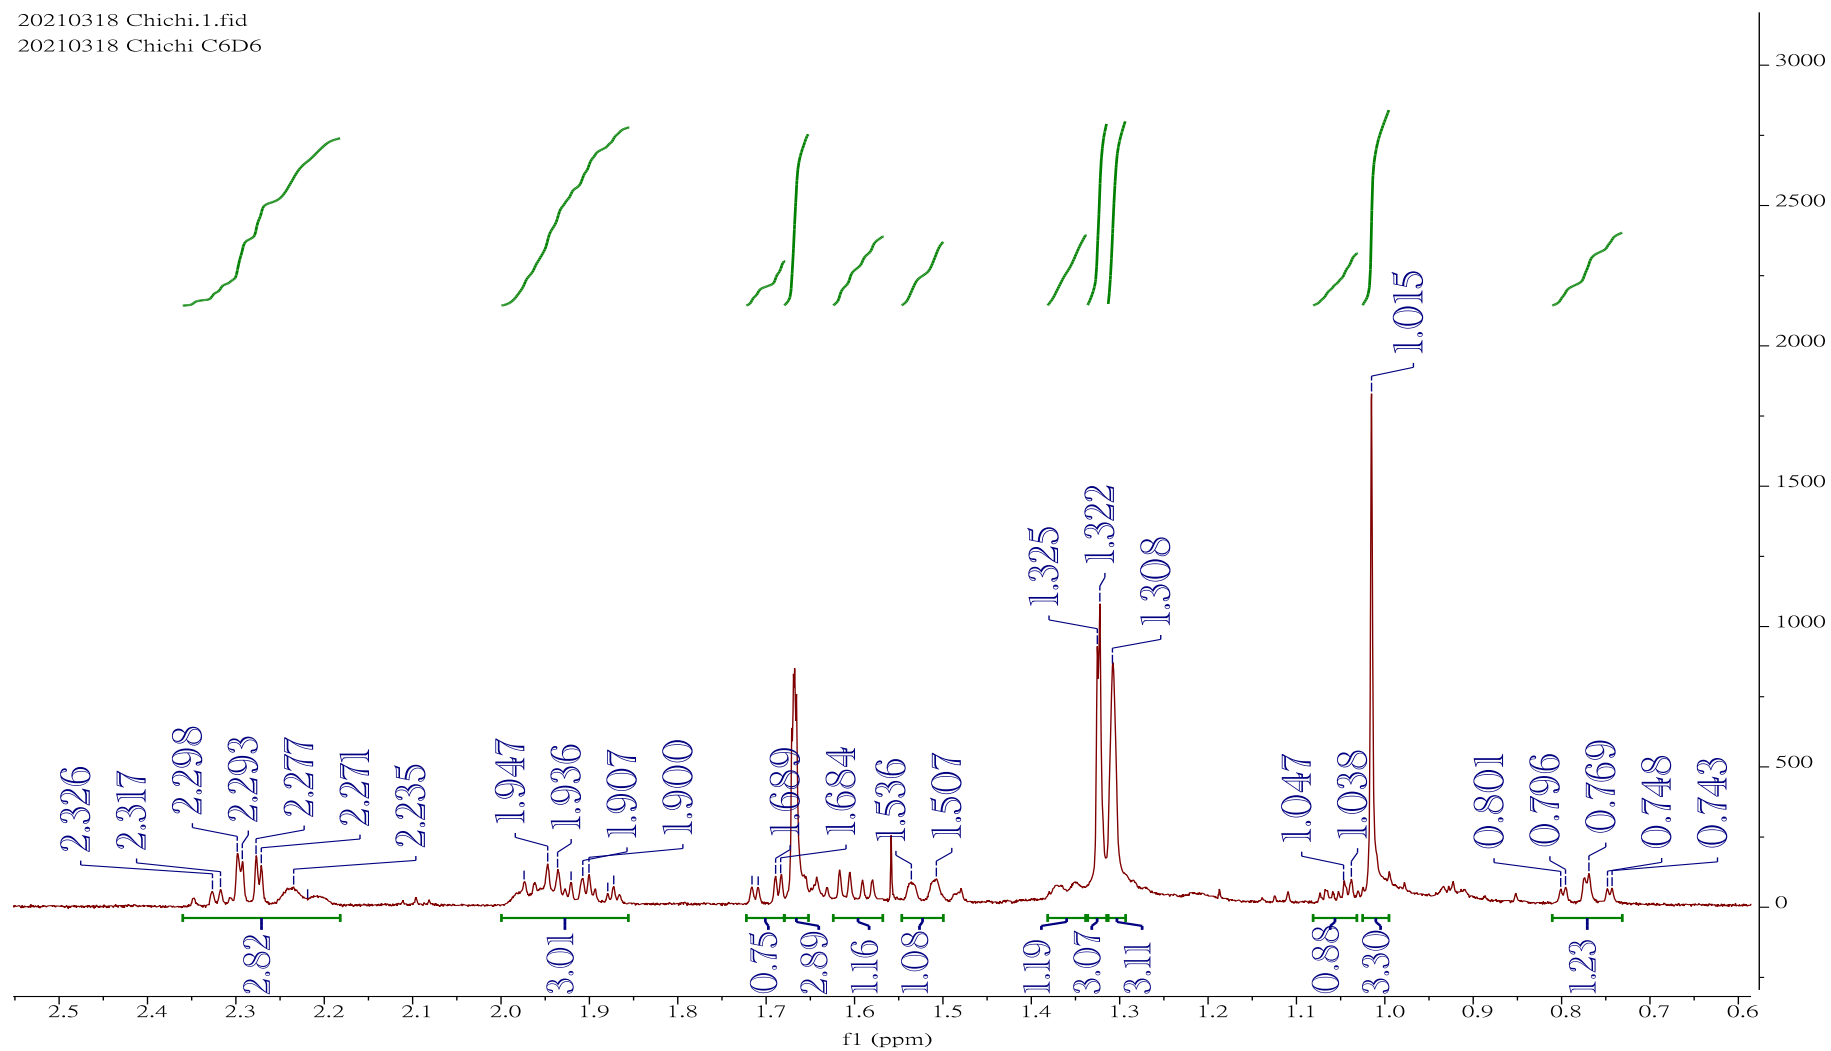

Figure S14:  $^1\text{H}$  NMR spectrum (from 0.6 to 2.5 ppm) of **1** in  $\text{C}_6\text{D}_6$  at 500 MHz

20210318 Chichi.4.fid  
20210318 Chichi C6D6 13C

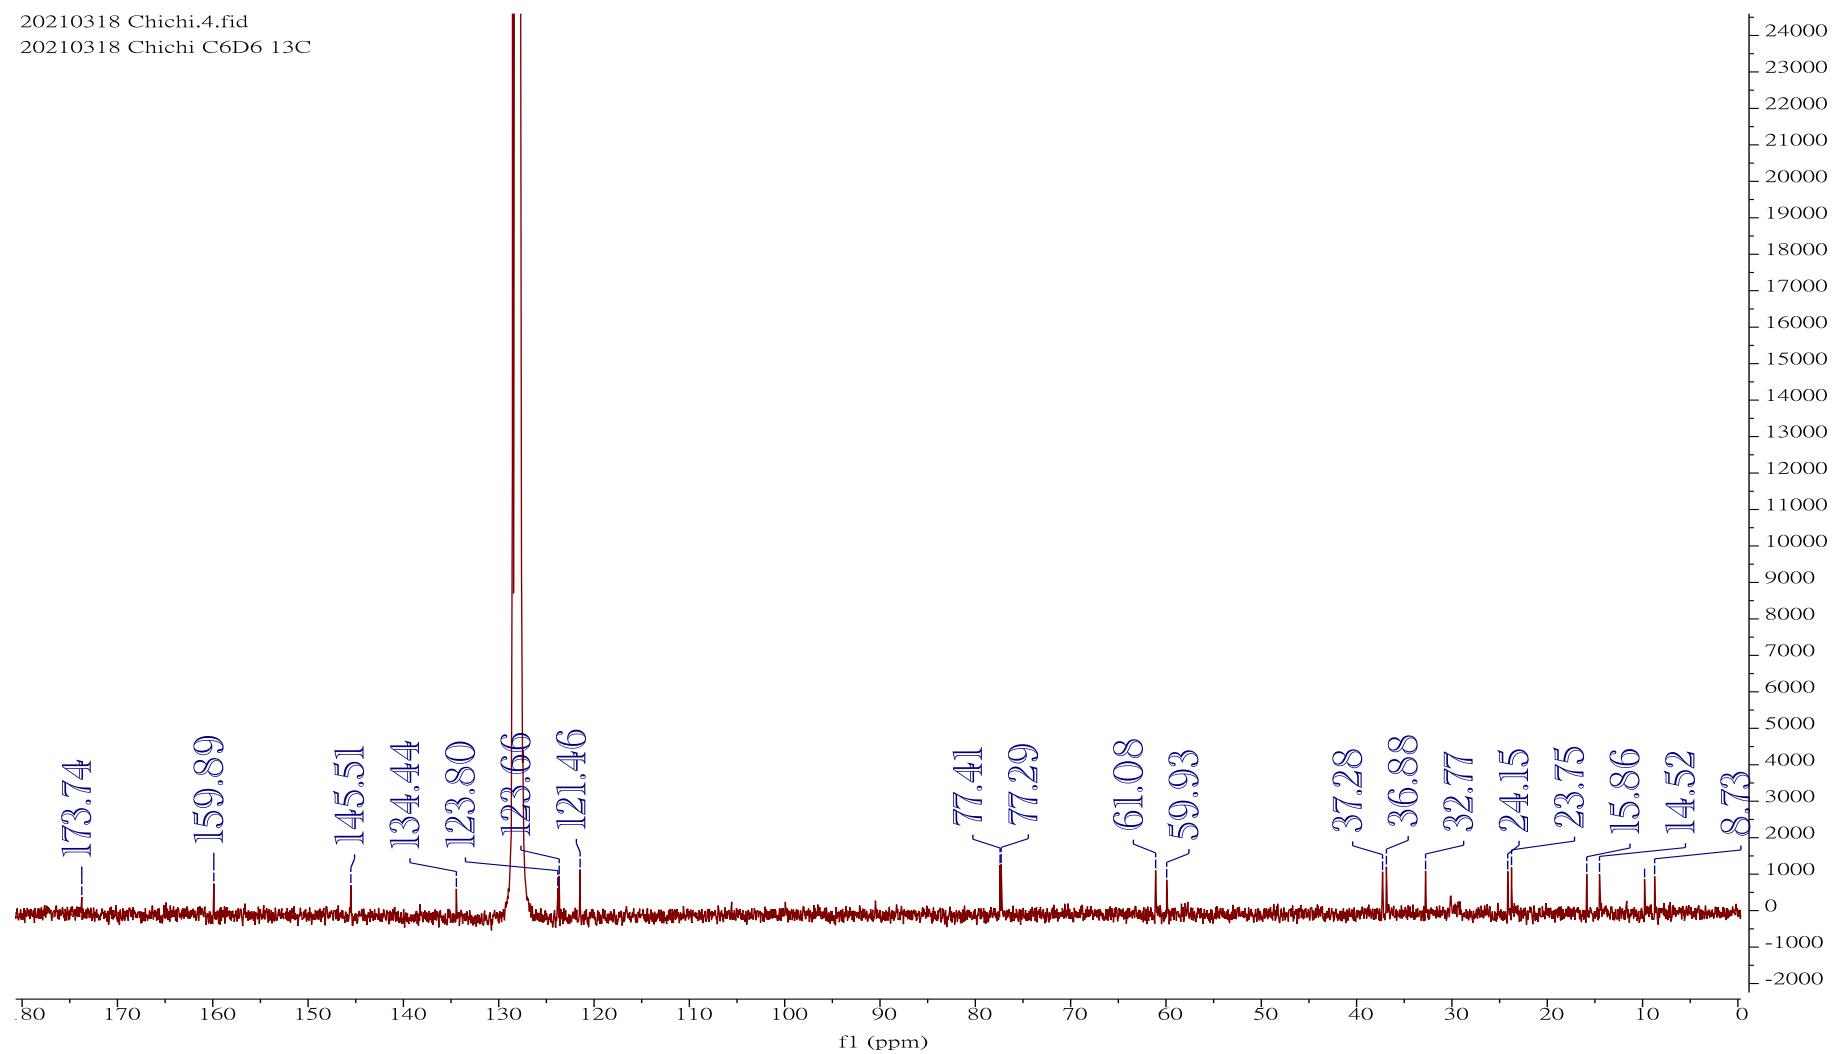

Figure S15: <sup>13</sup>C NMR spectrum of **1** in C<sub>6</sub>D<sub>6</sub> at 125 MHz



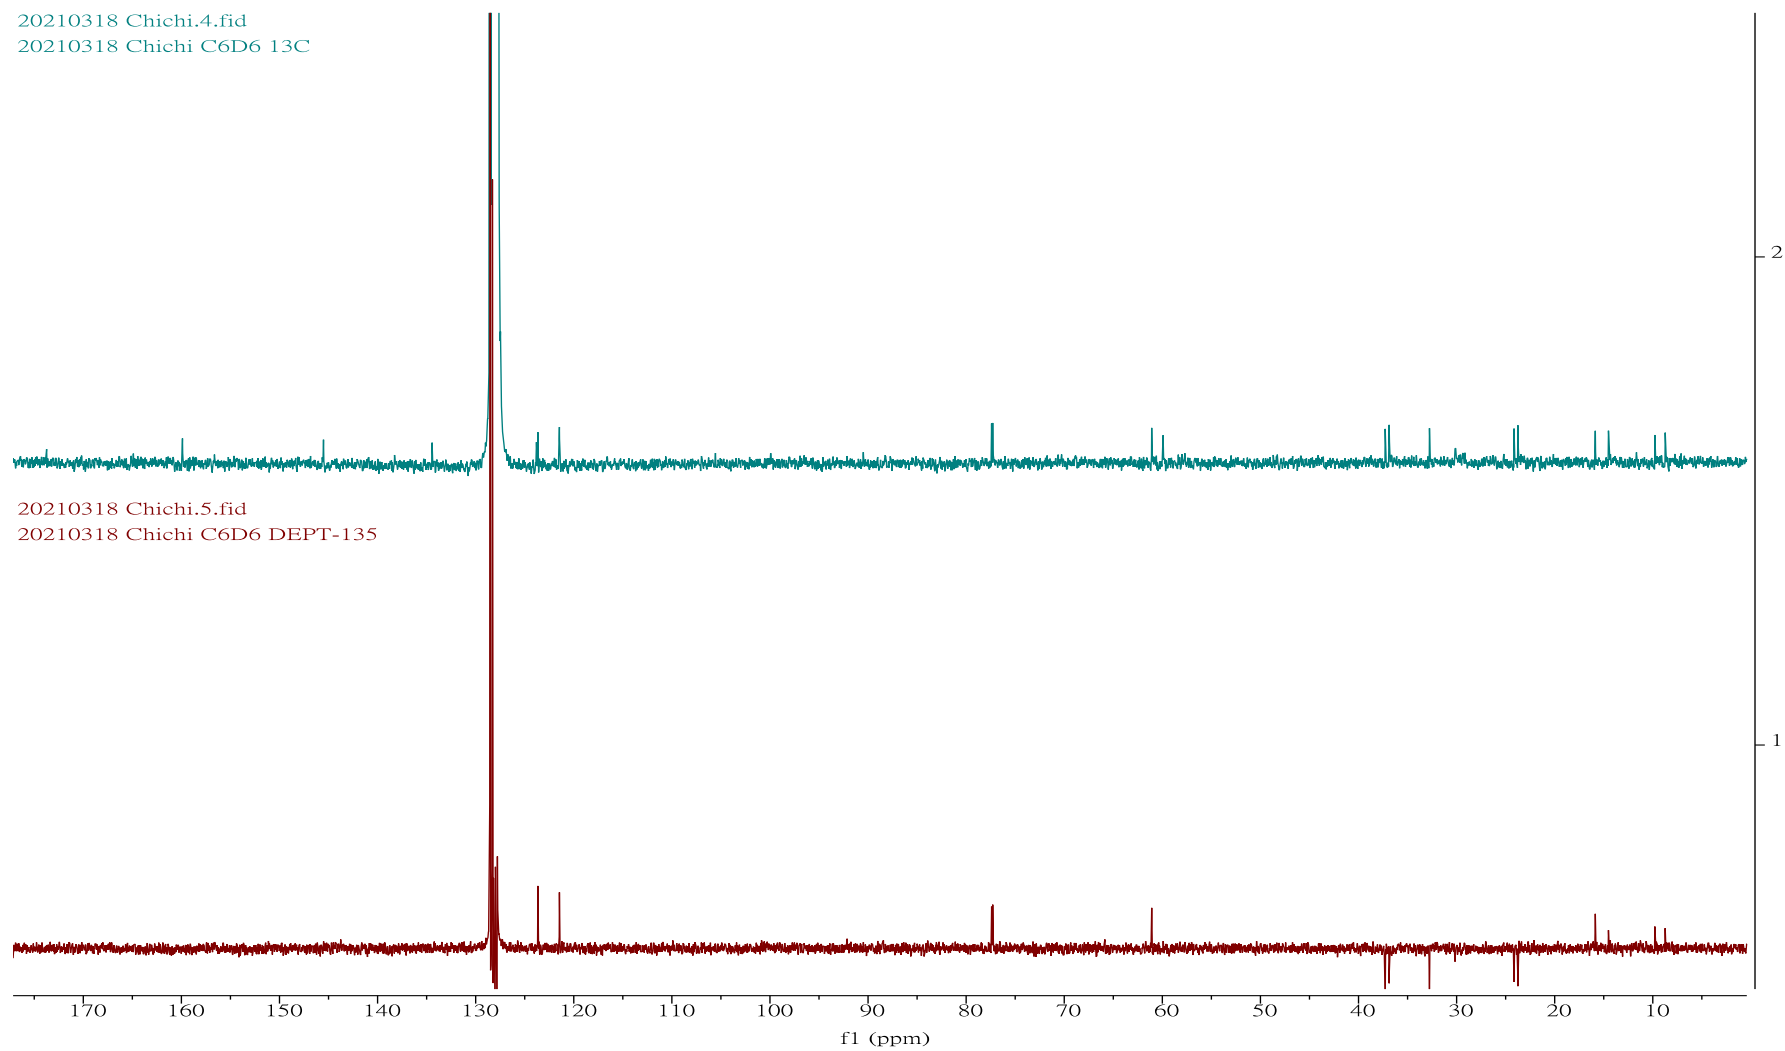

Figure S16: DEPT spectrum of **1** in C<sub>6</sub>D<sub>6</sub>

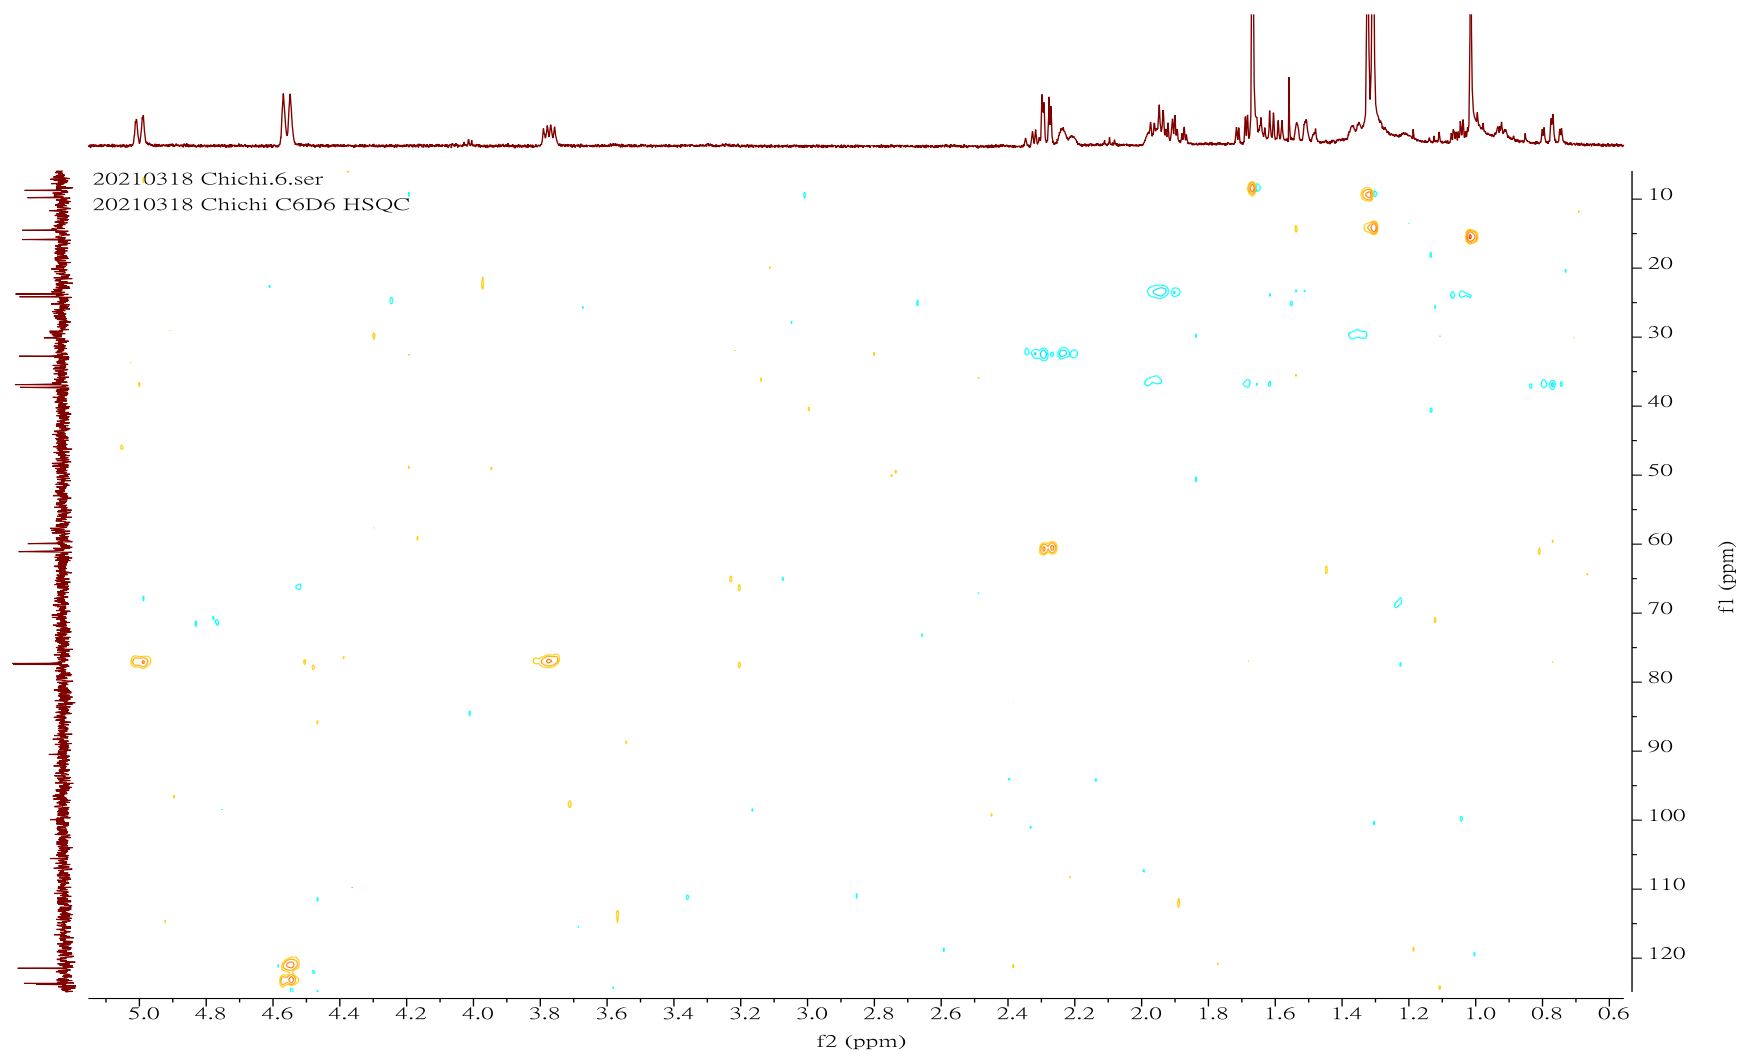

Figure S17: HSQC spectrum of **1** in C<sub>6</sub>D<sub>6</sub>

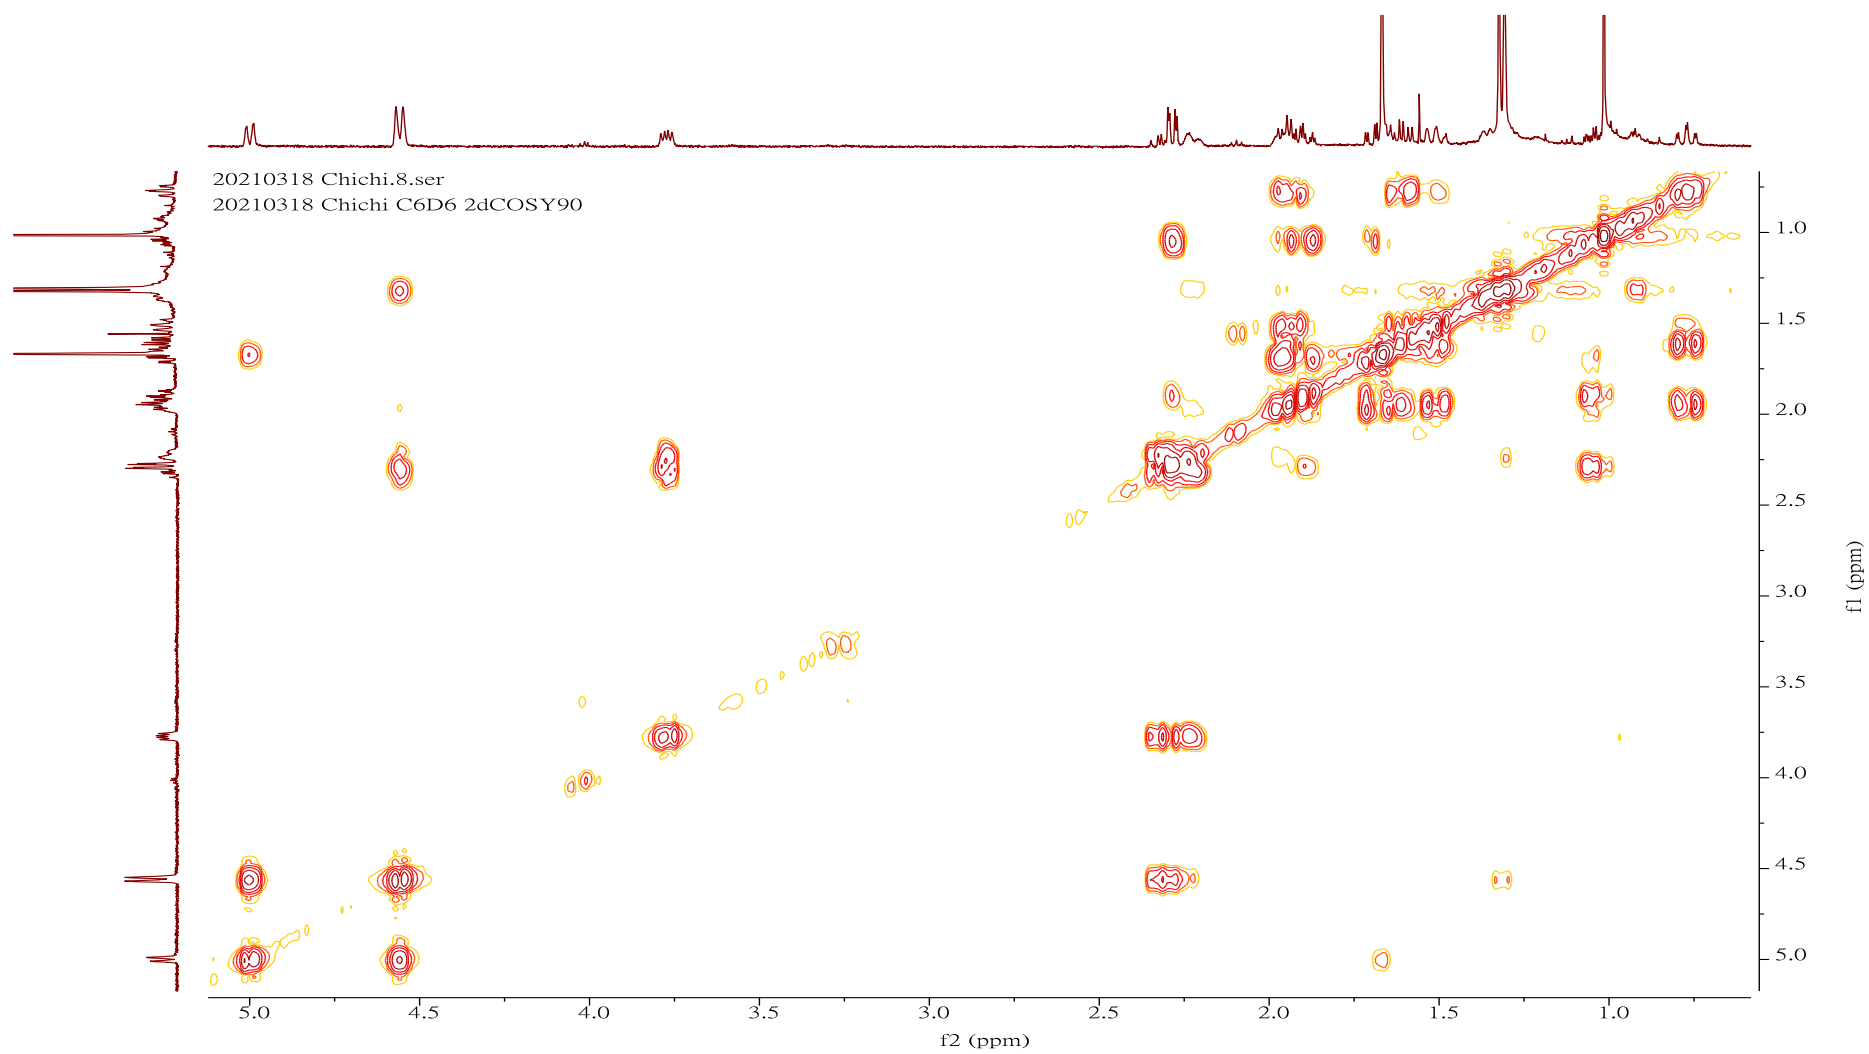

Figure S18: COSY spectrum of **1** in C<sub>6</sub>D<sub>6</sub>

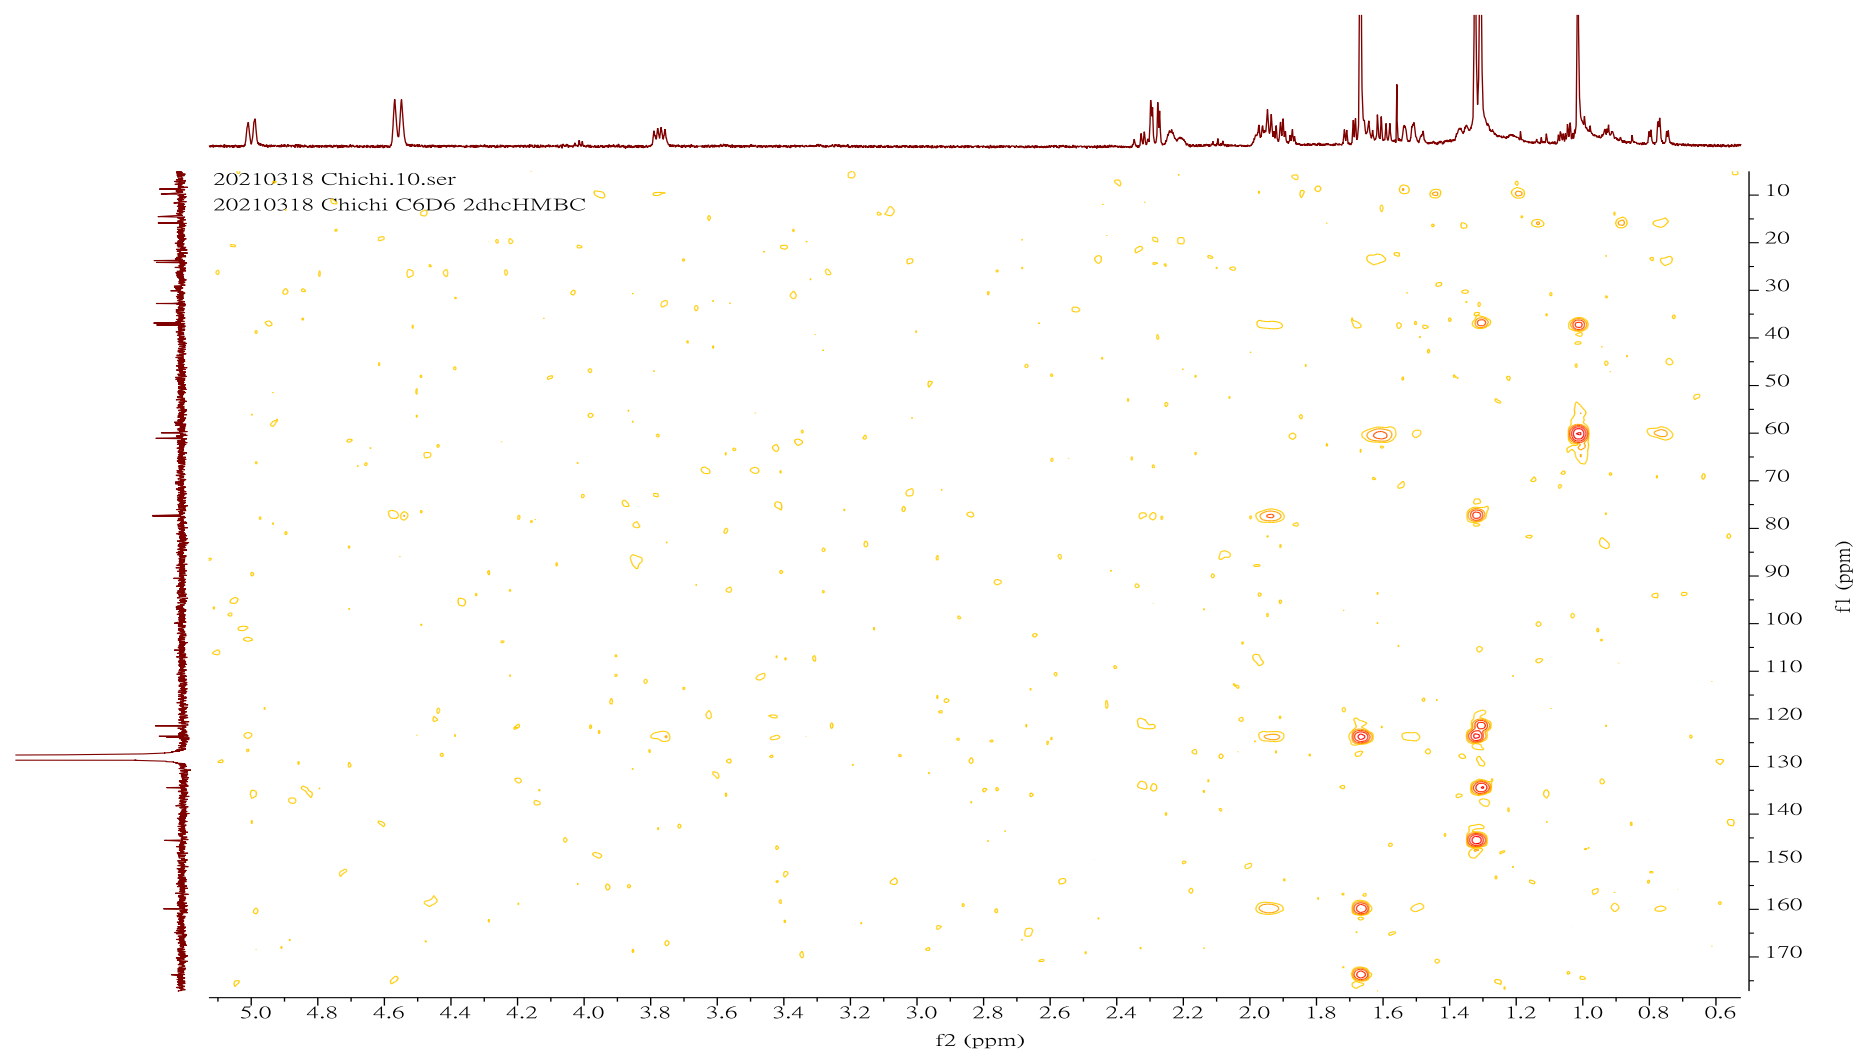

Figure S19: HMBC spectrum of **1** in C<sub>6</sub>D<sub>6</sub>

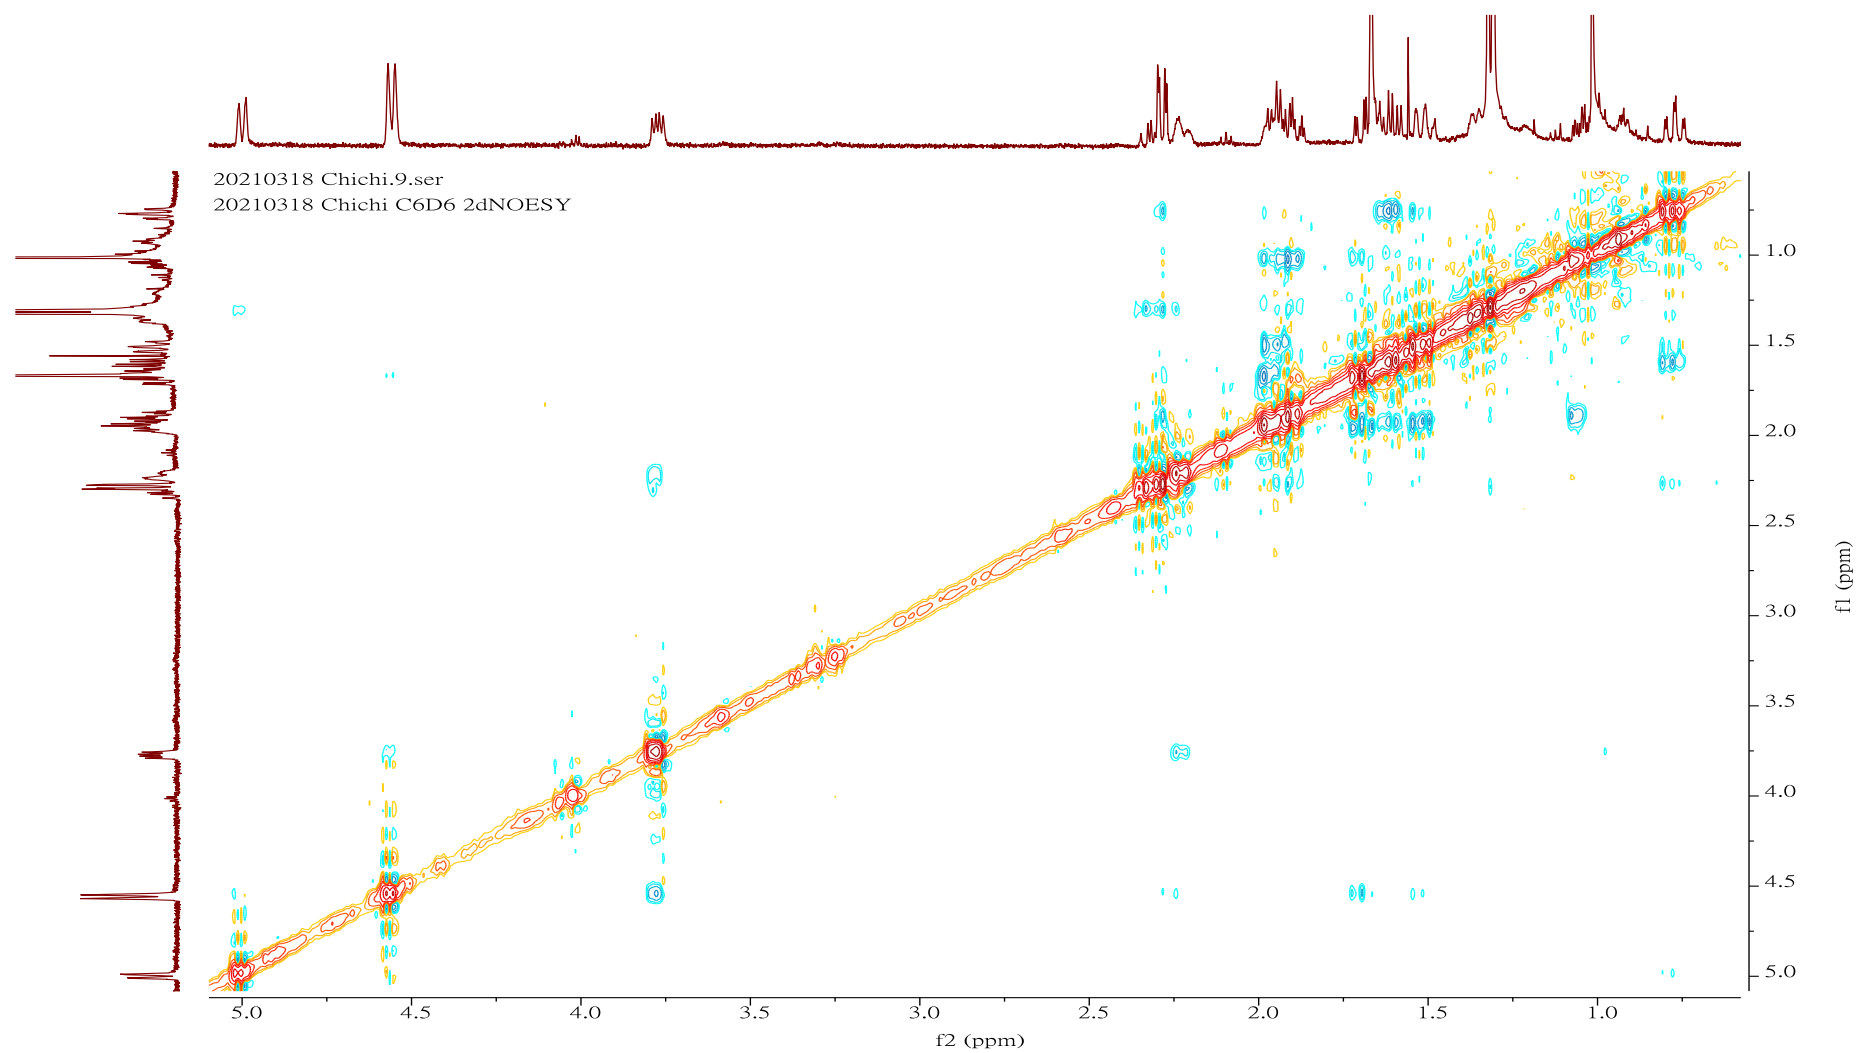

Figure S20: NOESY spectrum of **1** in C<sub>6</sub>D<sub>6</sub>

## Spectroscopic data of cherbonolide N (2)

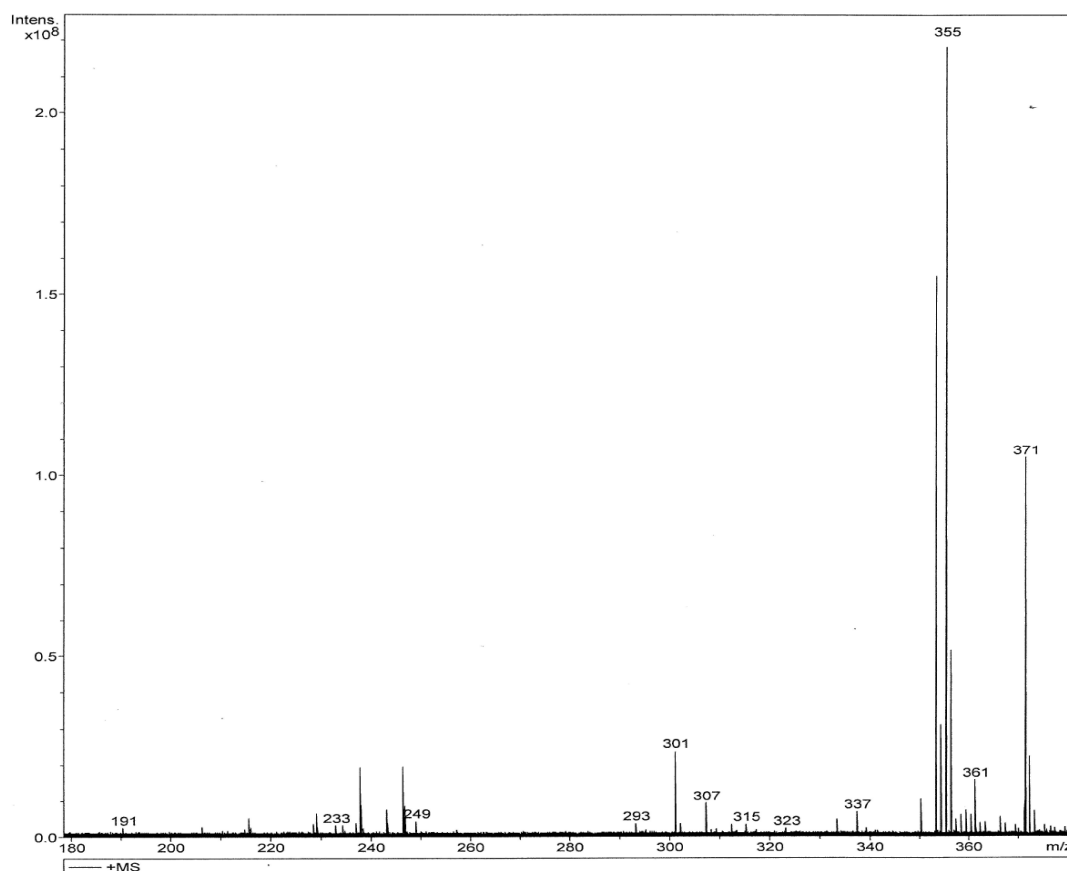

Figure S21: ESIMS spectrum of 2

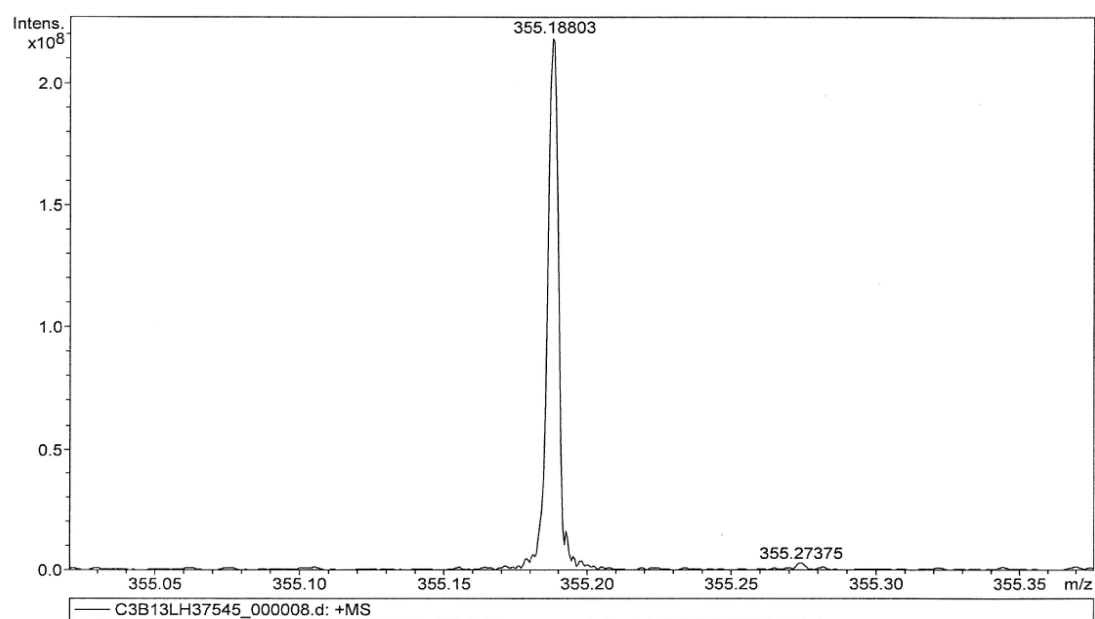

| Meas. m/z | # | Formula                                          | Score  | m/z       | err [mDa] | err [ppm] | mSigma | rdB | e <sup>-</sup> Conf | N-Rule |
|-----------|---|--------------------------------------------------|--------|-----------|-----------|-----------|--------|-----|---------------------|--------|
| 355.18803 | 1 | C <sub>20</sub> H <sub>28</sub> NaO <sub>4</sub> | 100.00 | 355.18798 | -0.05     | -0.15     | 12.4   | 6.5 | even                | ok     |

Figure S22: HRESIMS spectrum of 2

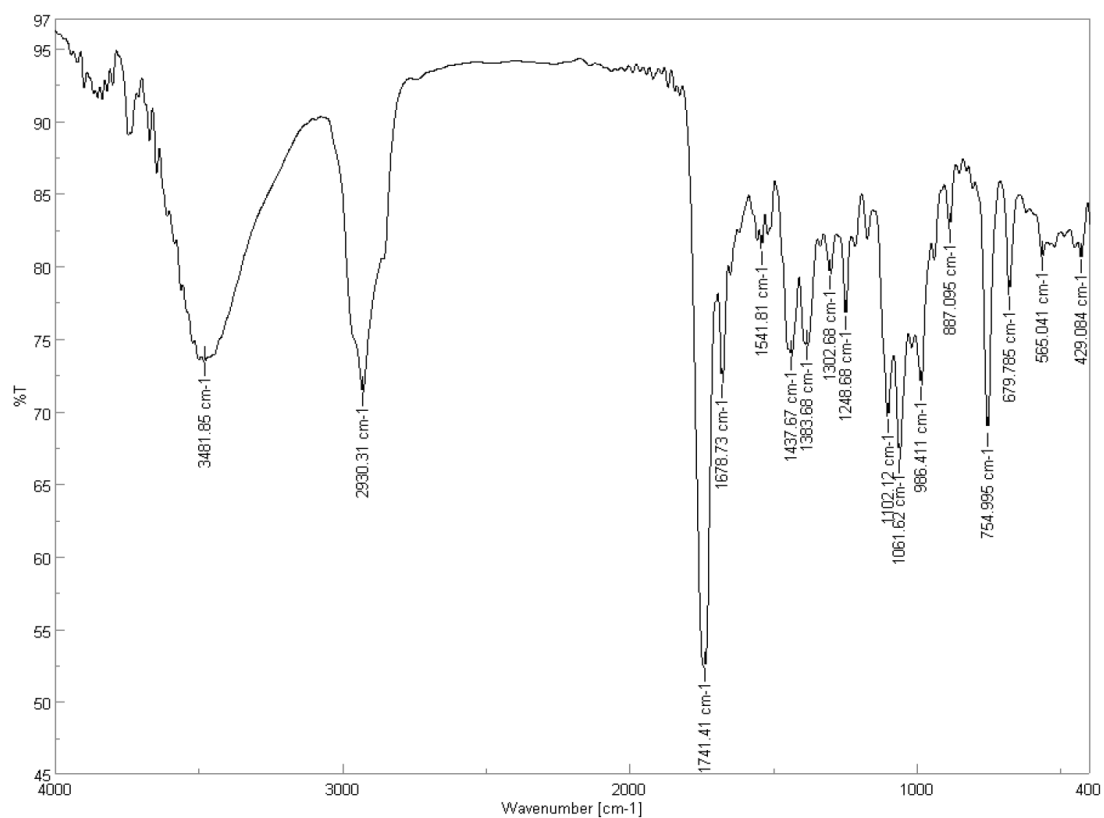

Figure S23: IR spectrum of **2**

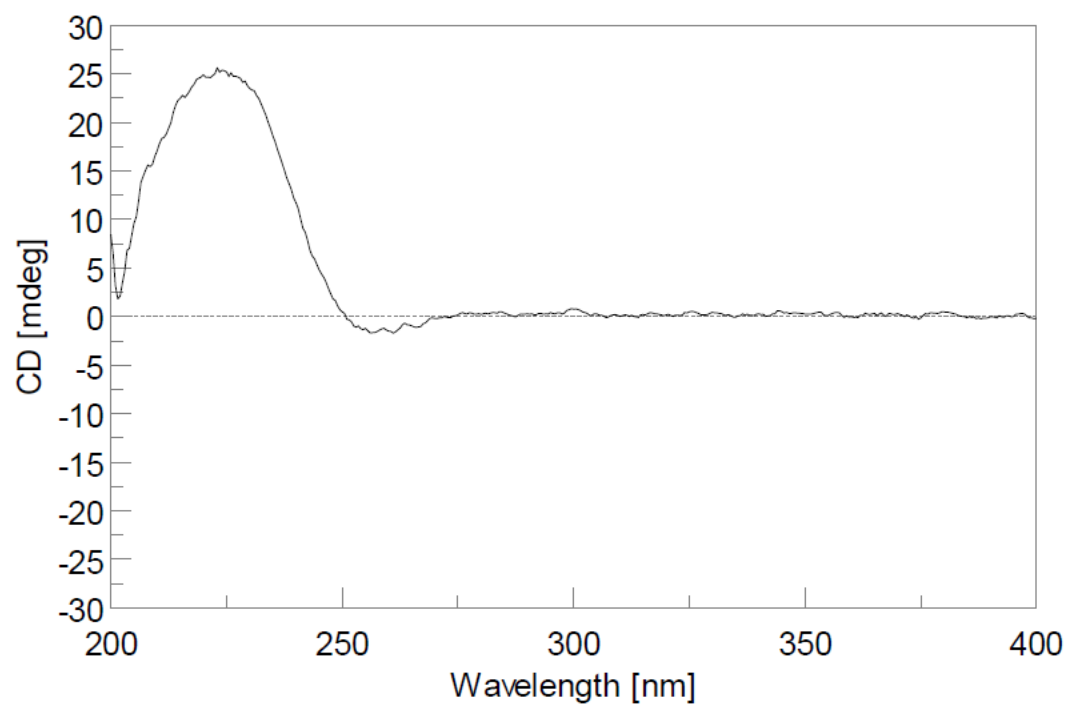

Figure S24: CD spectrum ( $1.2 \times 10^{-4}$  M, MeOH) of **2**

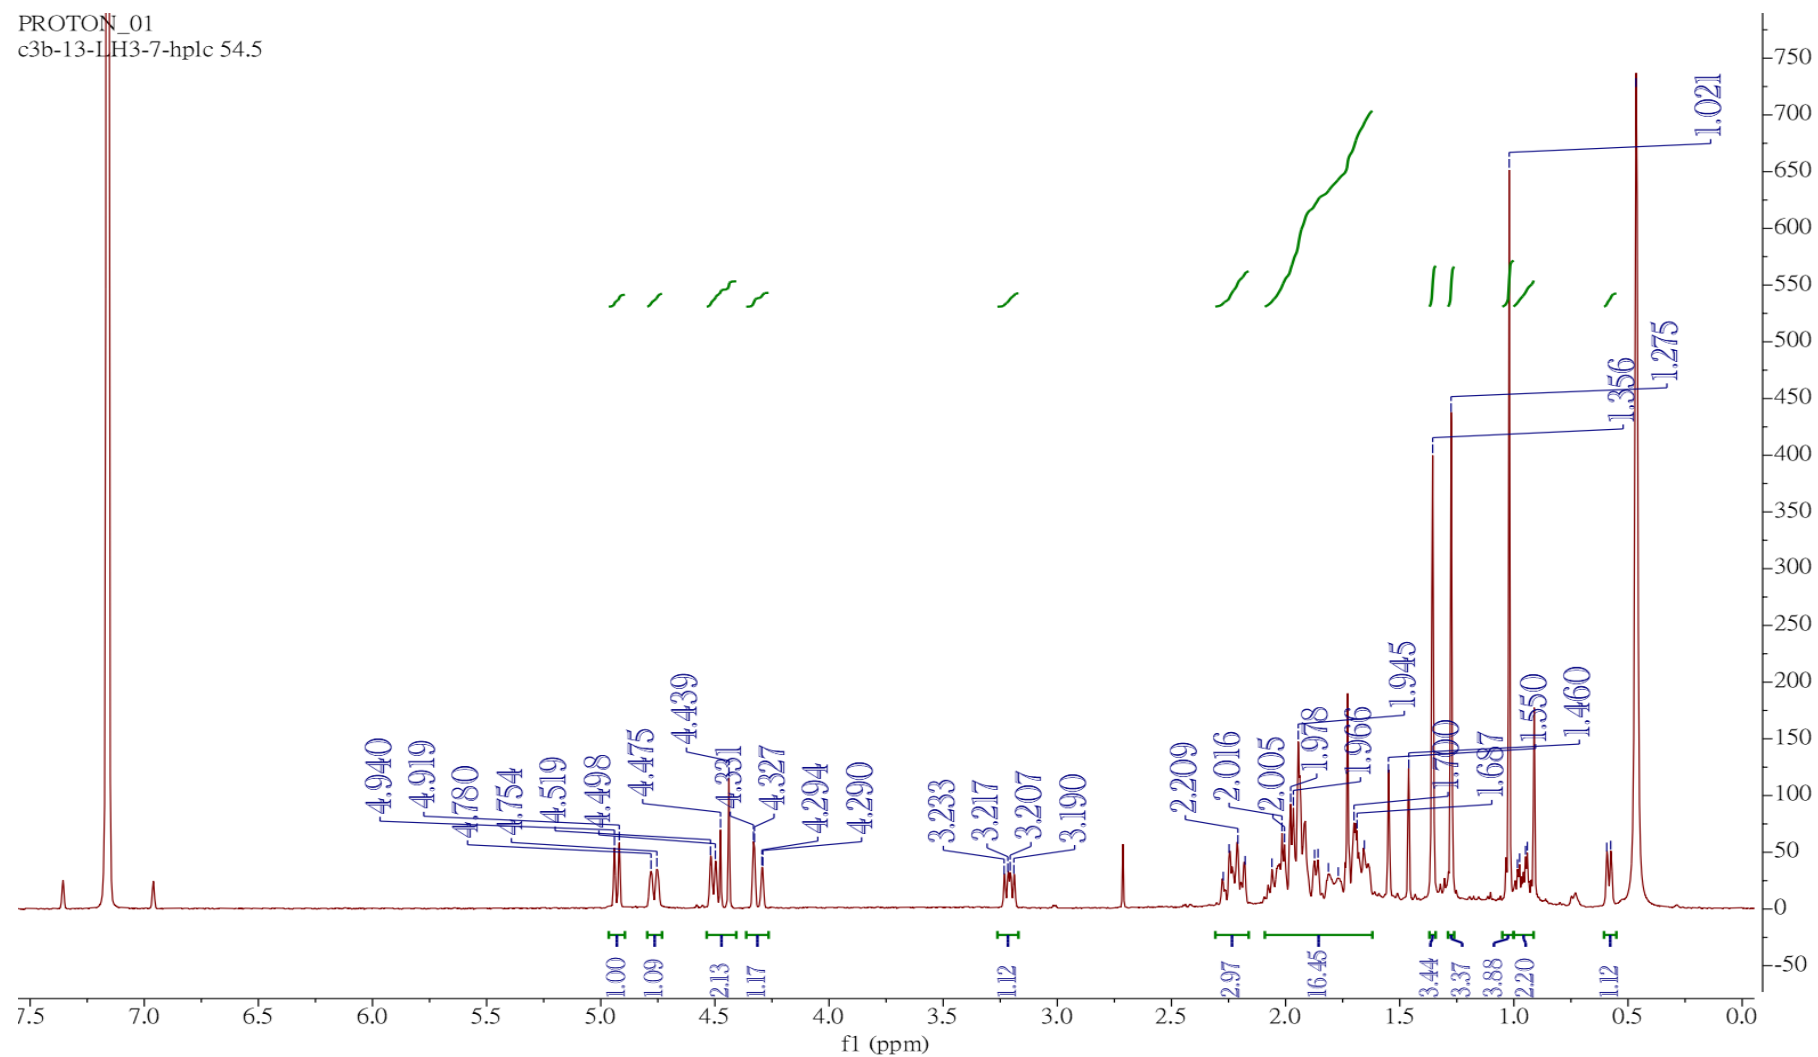

Figure S25:  $^1\text{H}$  NMR spectrum of **2** in  $\text{C}_6\text{D}_6$  at 400 MHz



PROTON\_01  
c3b-13-LH3-7-hplc 54.5

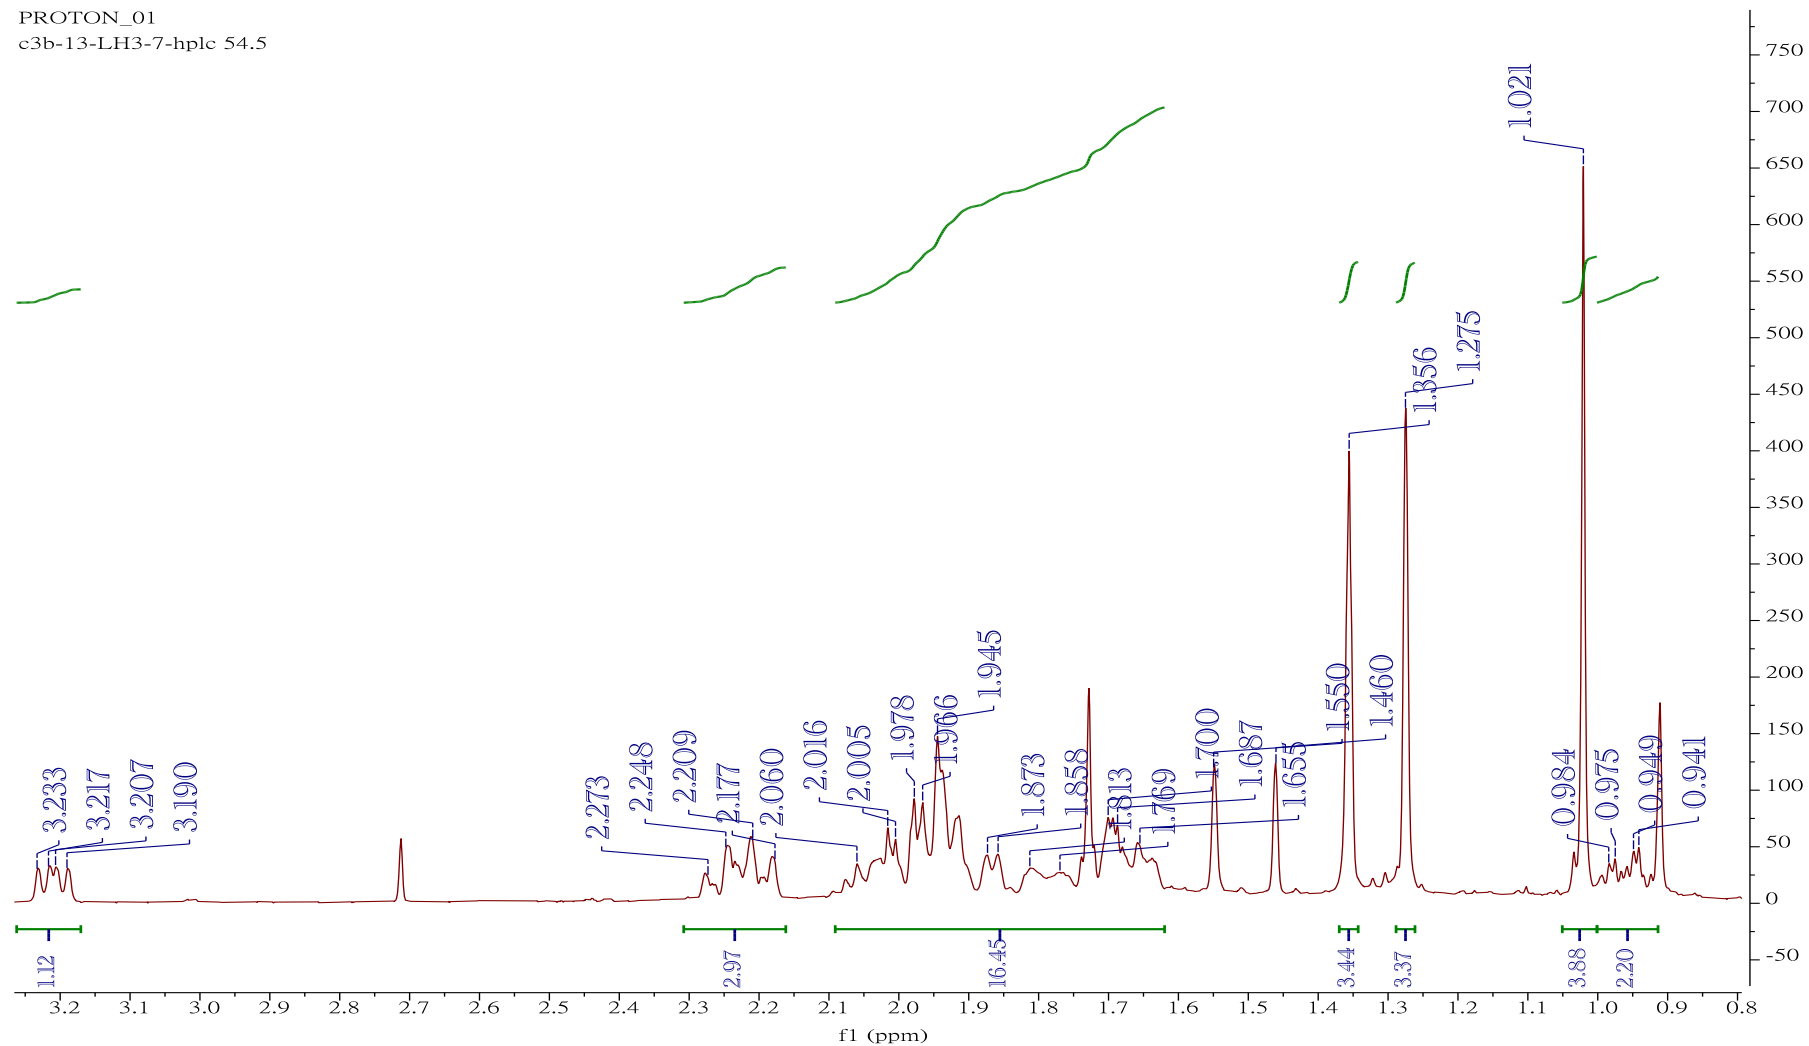

Figure S26:  $^1\text{H}$  NMR spectrum (from 0.8 to 3.2 ppm) of **2** in  $\text{C}_6\text{D}_6$  at 400 MHz

CARBON\_01  
c3b-13-LH3-7-hplc 54.5

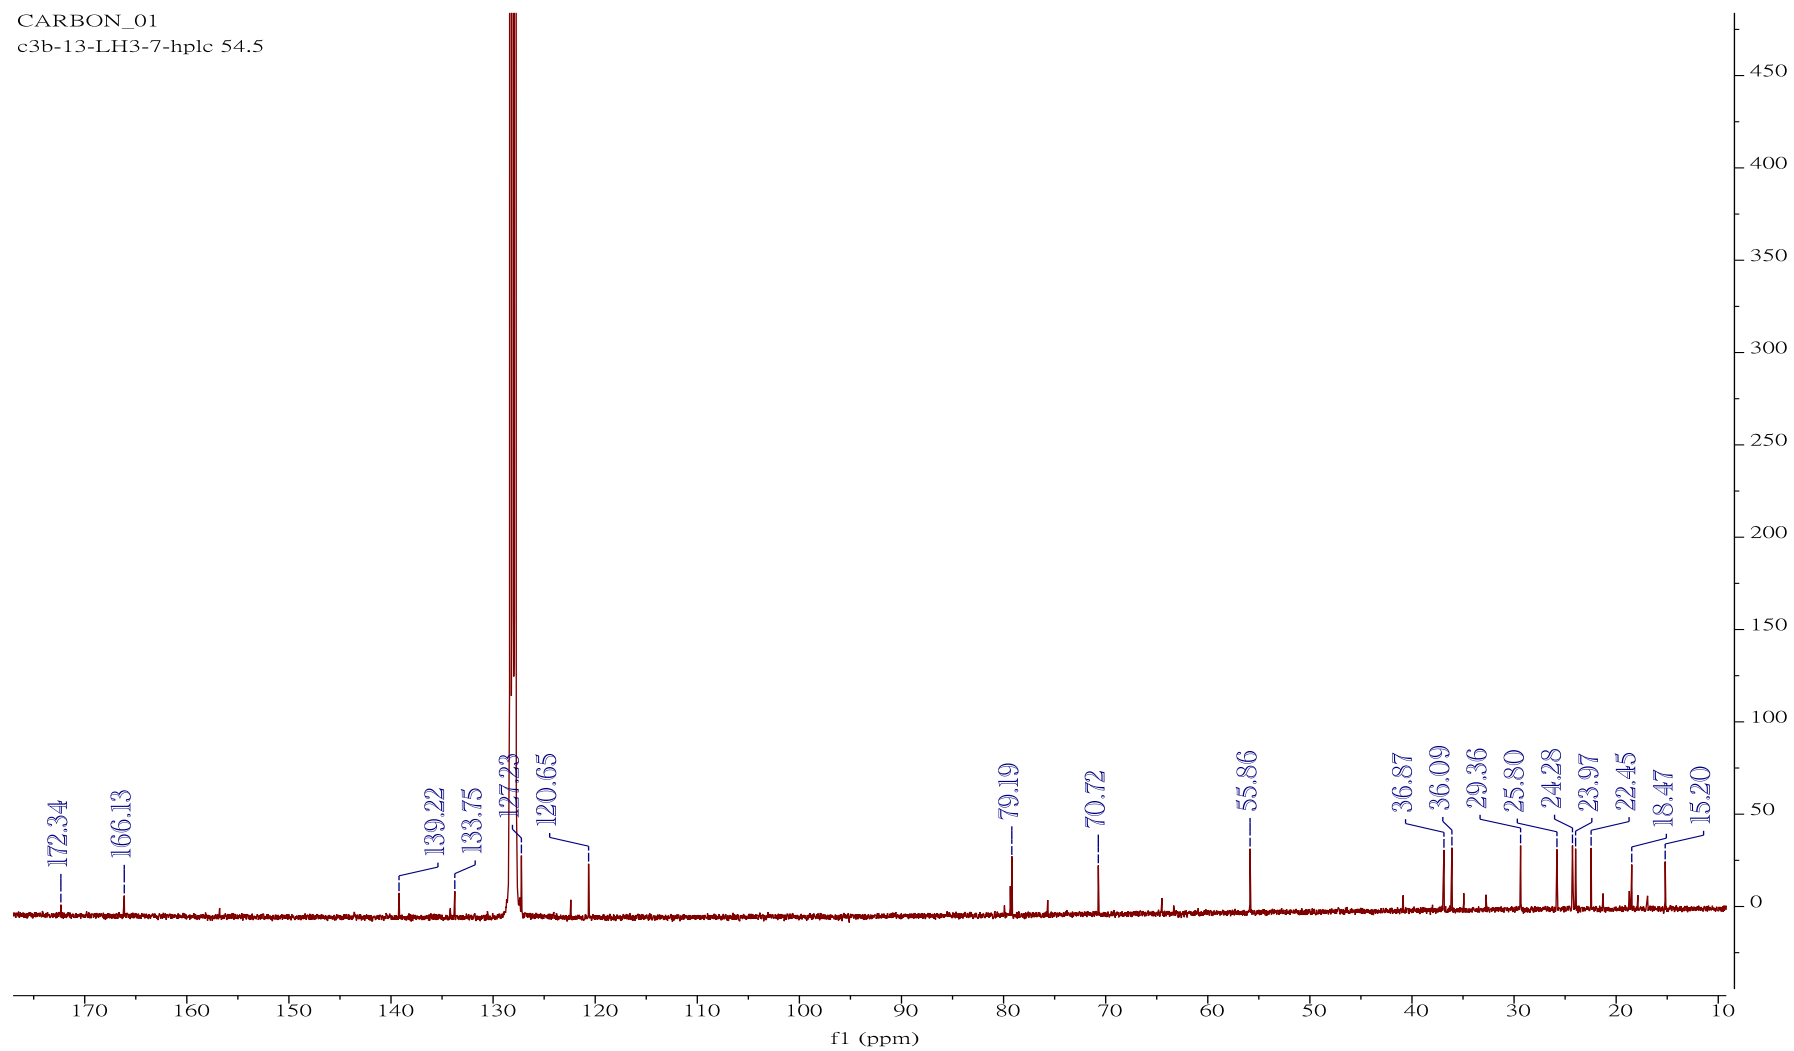

Figure S27: <sup>13</sup>C NMR spectrum of **2** in C<sub>6</sub>D<sub>6</sub> at 100 MHz

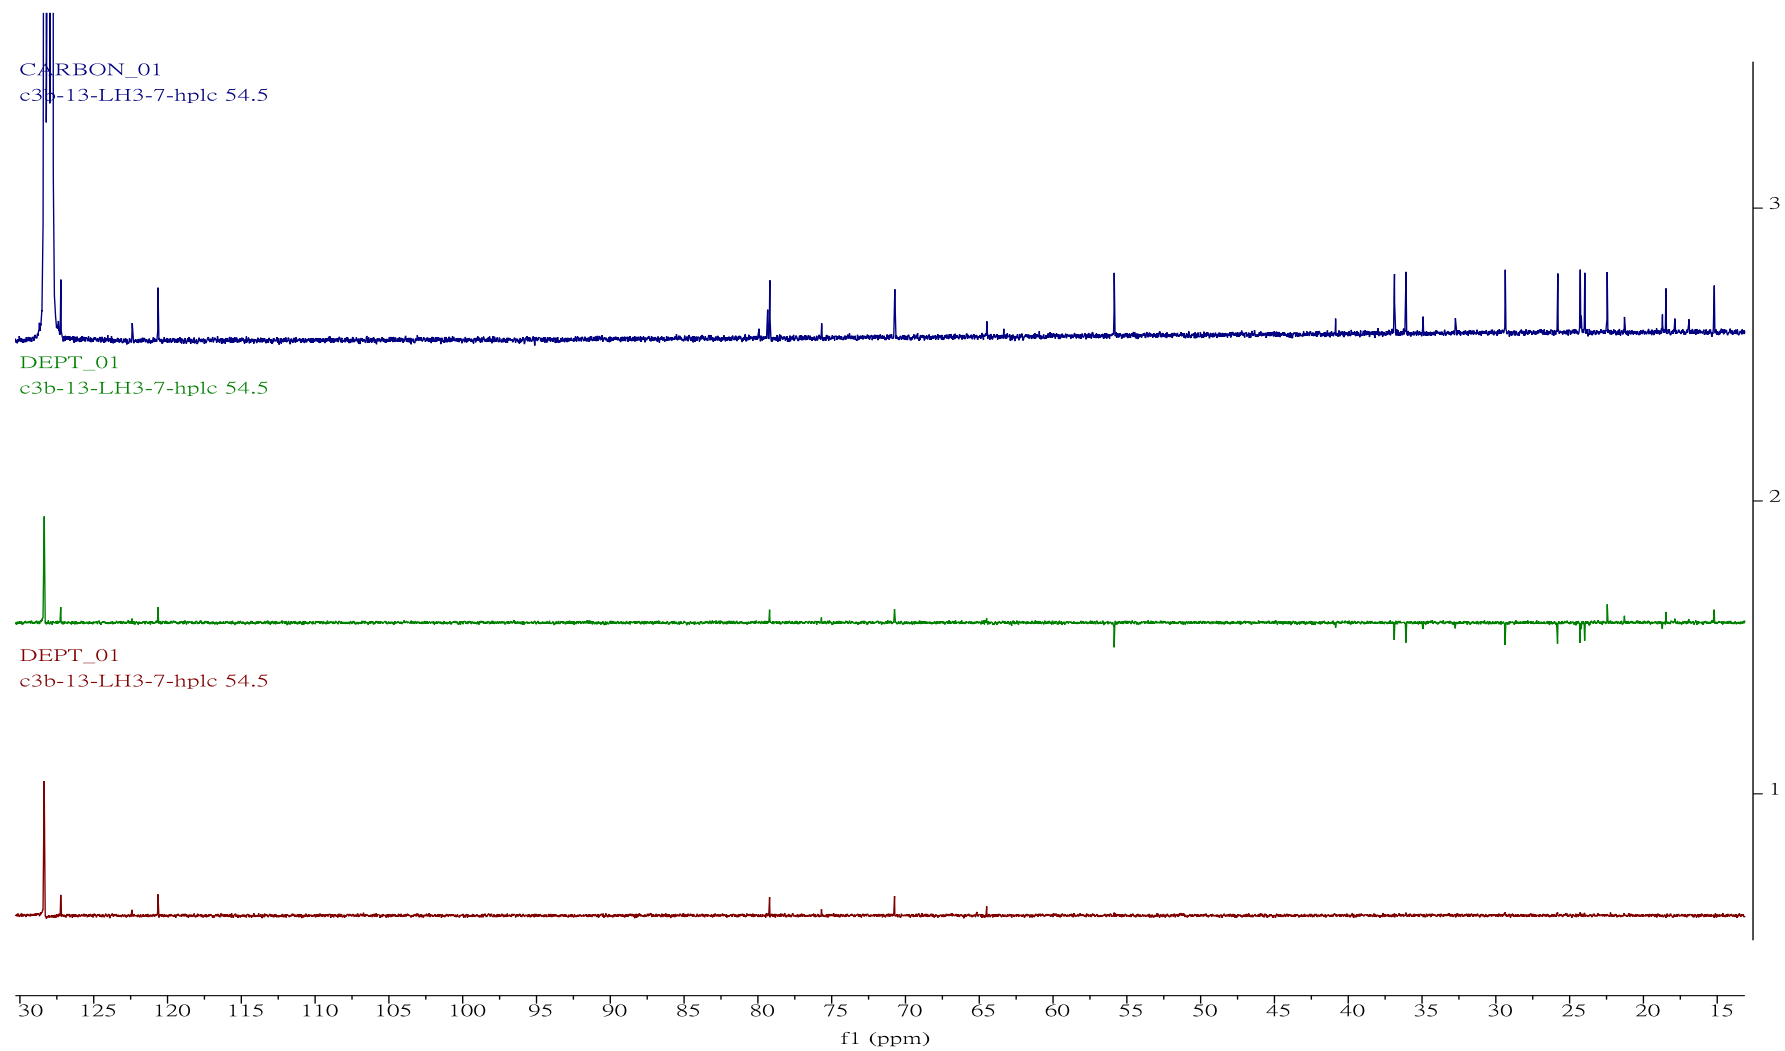

Figure S28: DEPT spectrum of 2

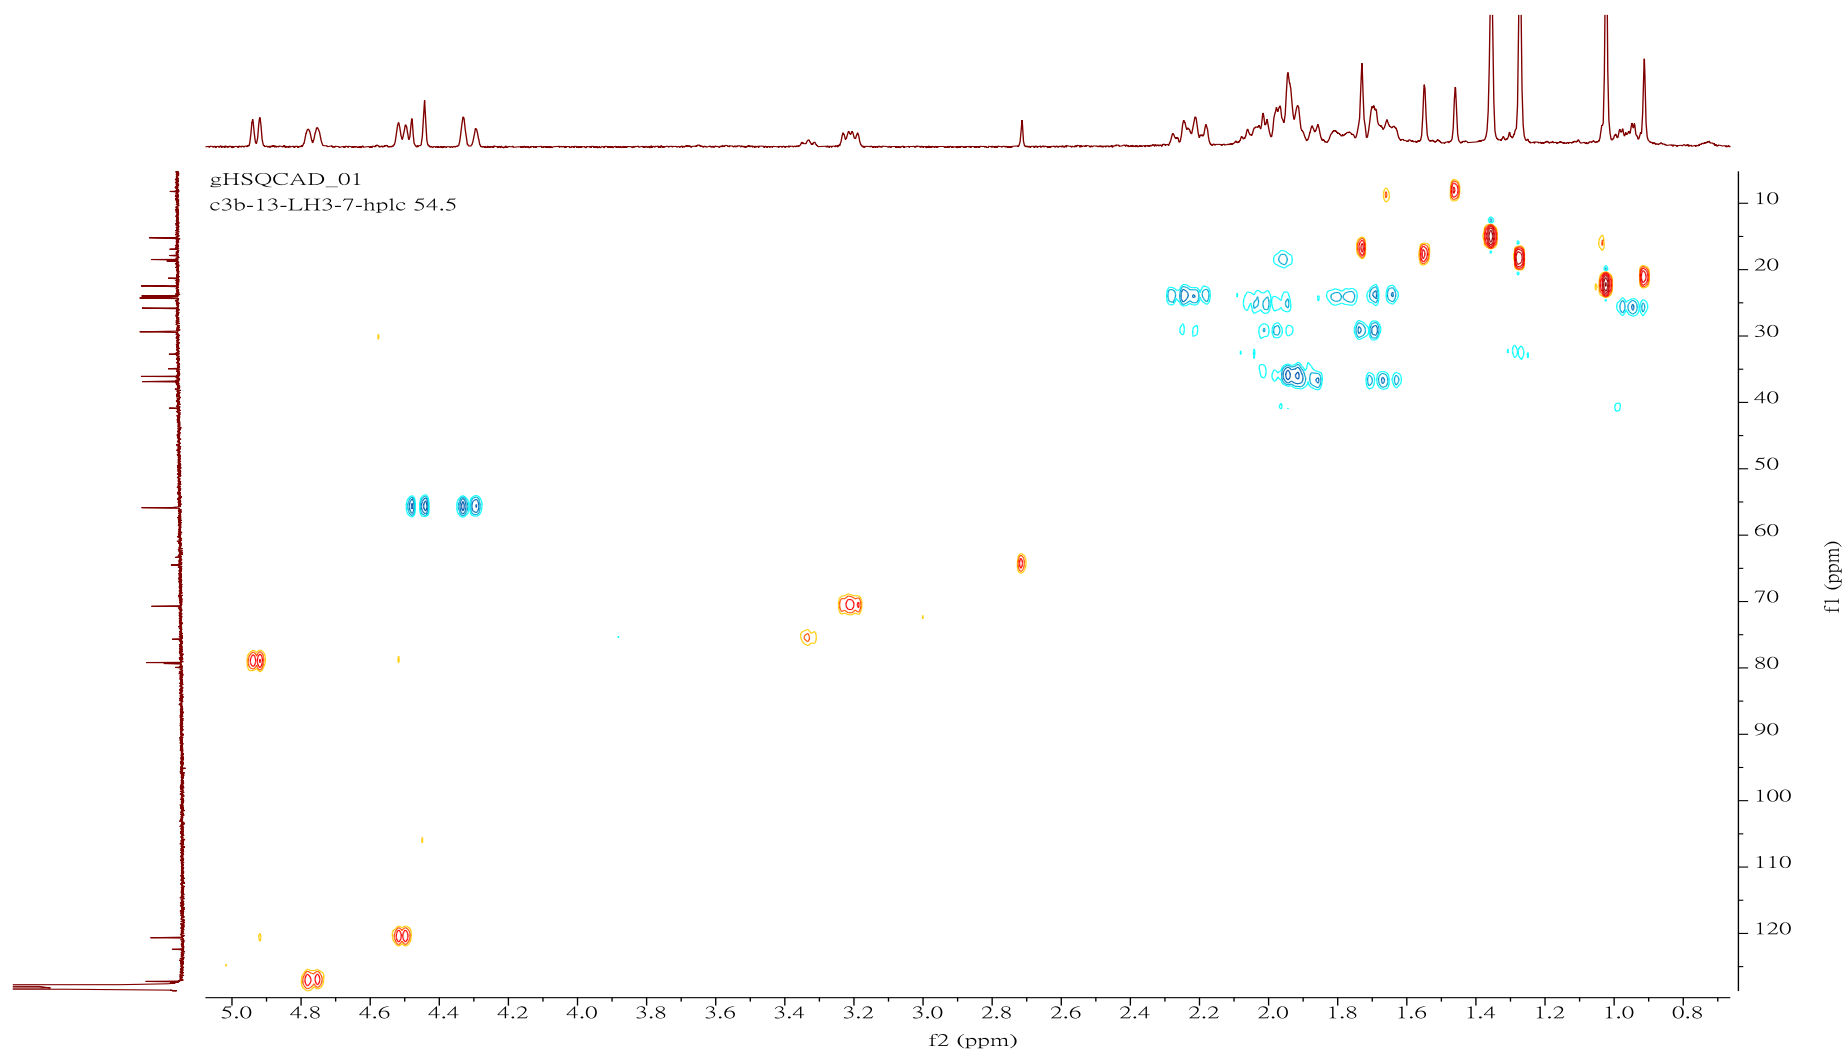

Figure S29: HSQC spectrum of **2**



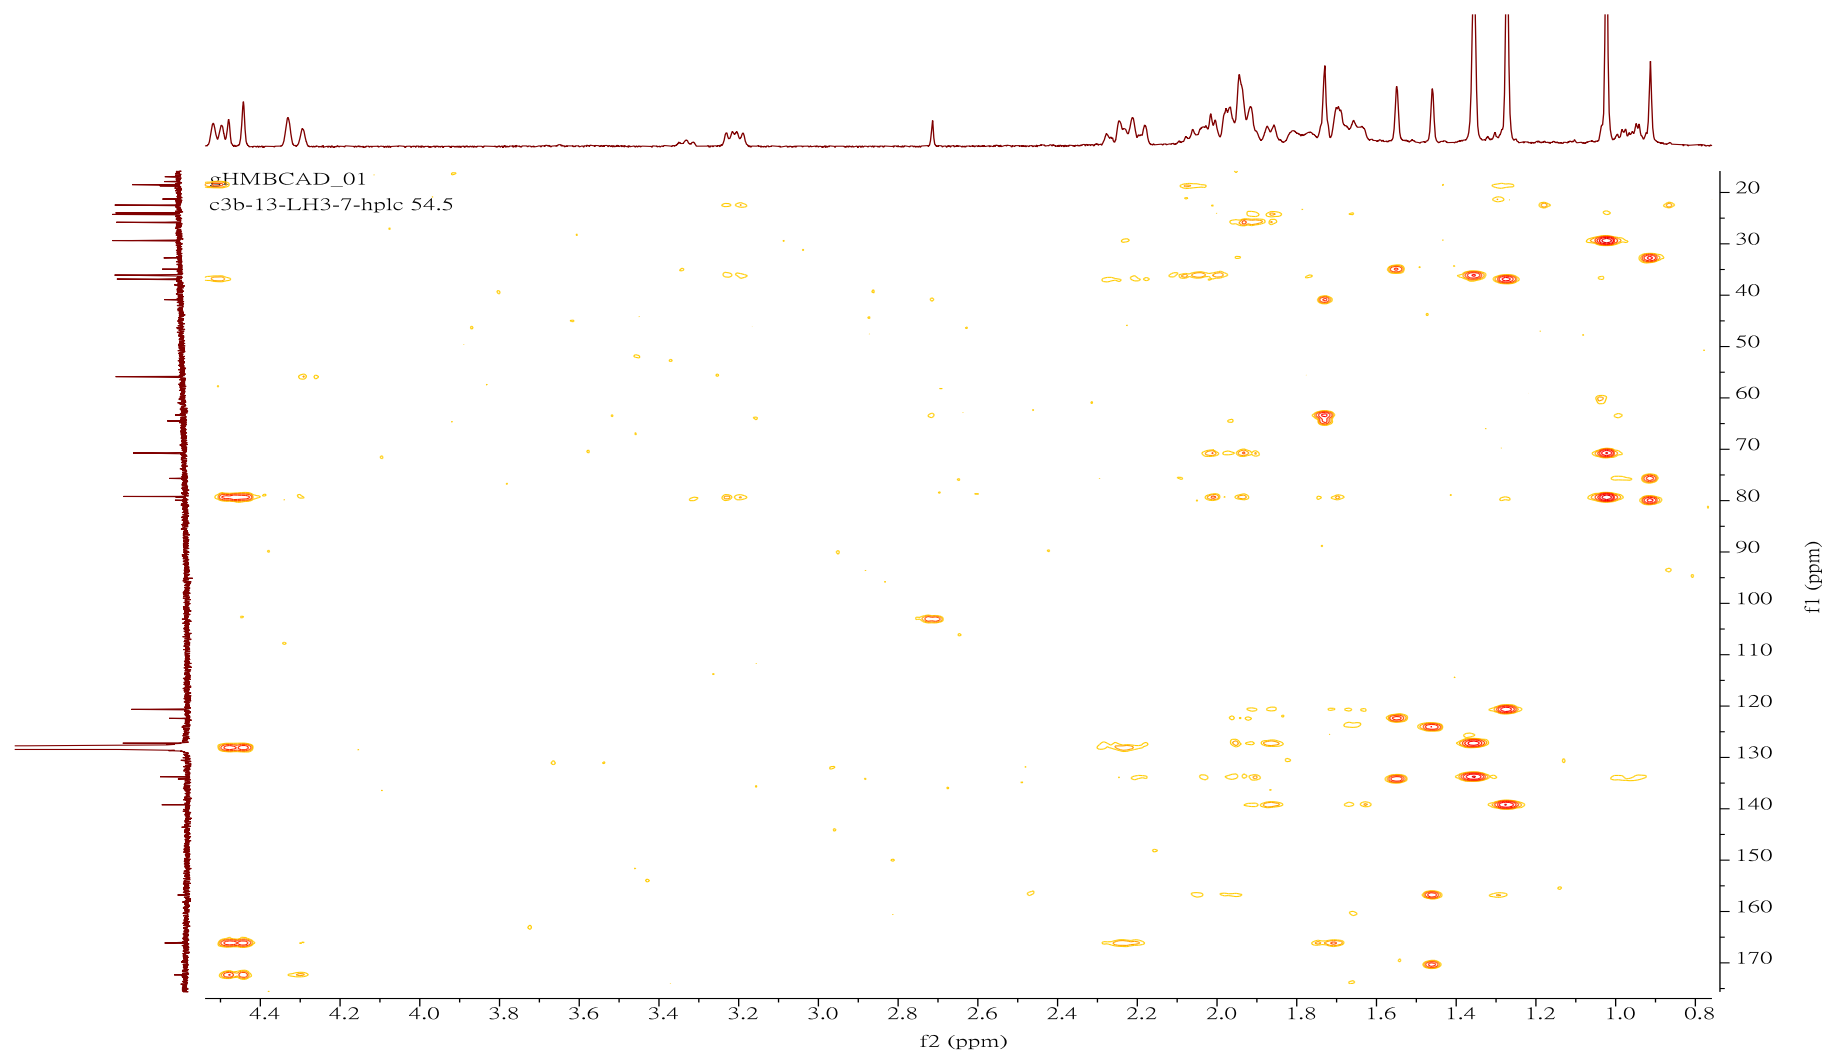

Figure S31: HMBC spectrum of **2**

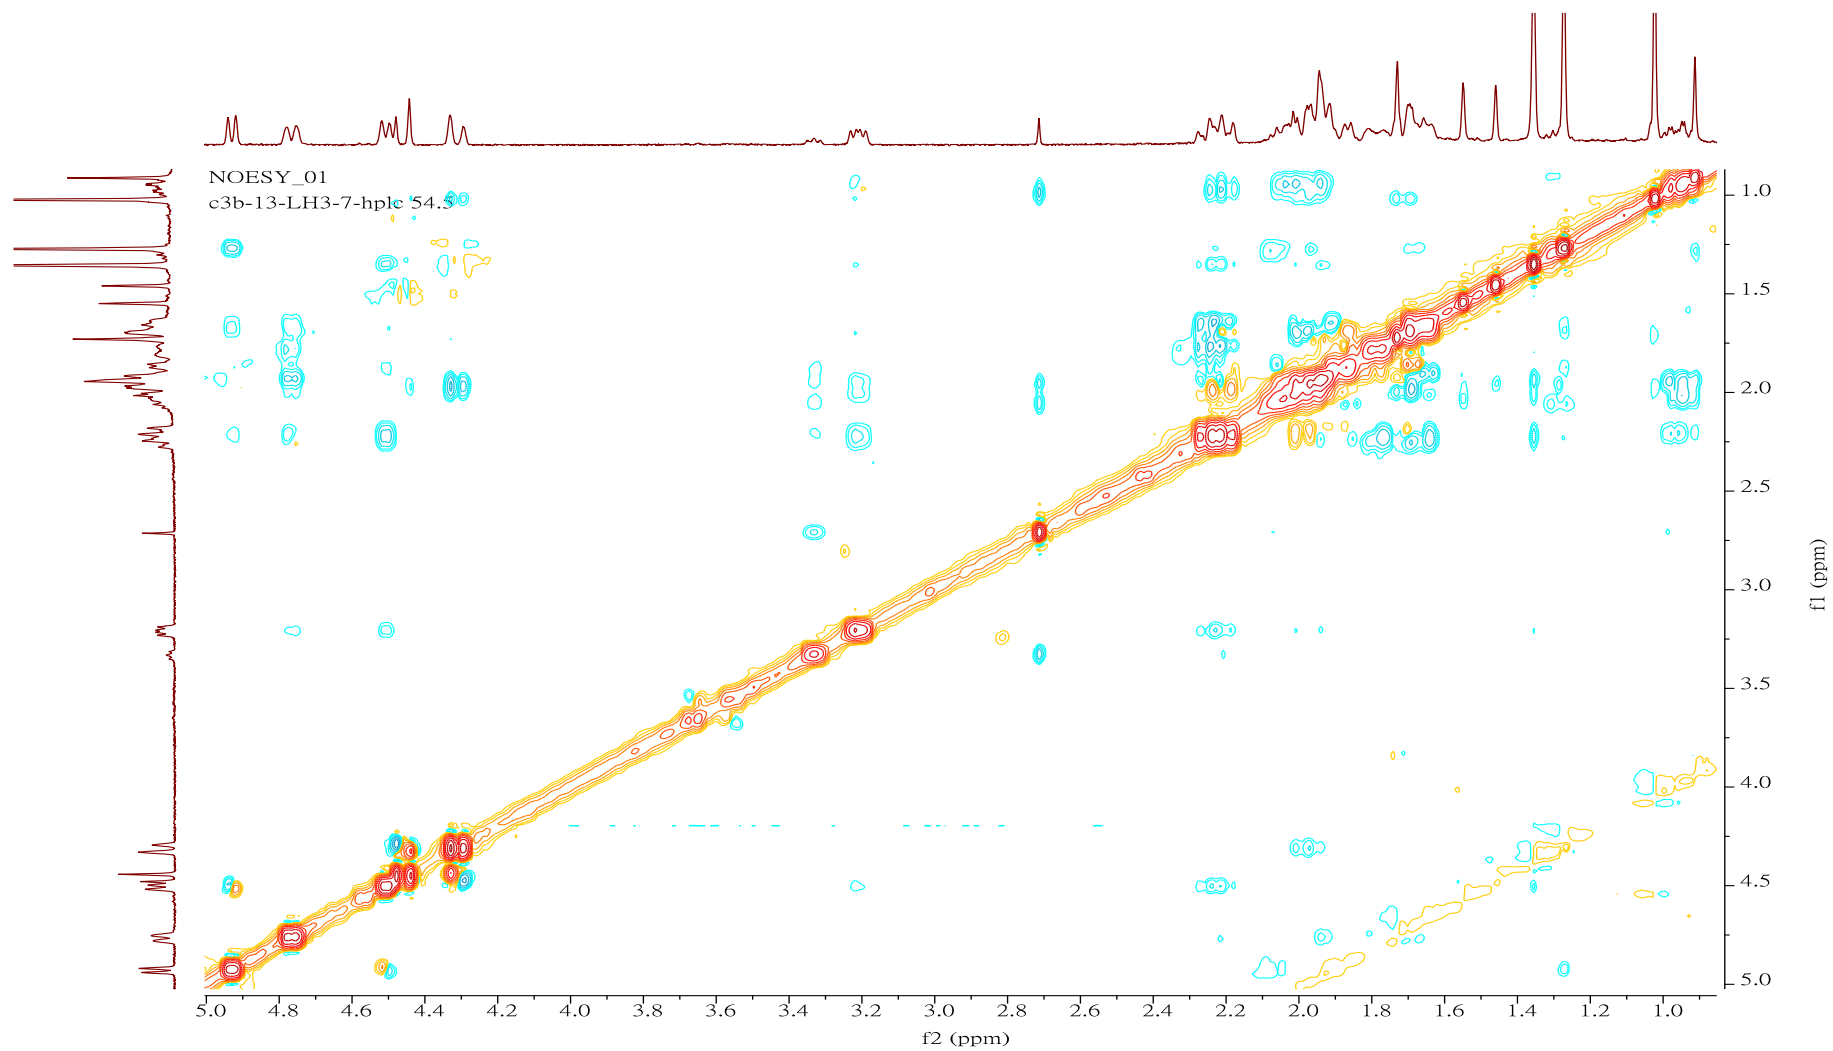

Figure S32: NOESY spectrum of **2**

### Spectroscopic data of isosarcophine (3)

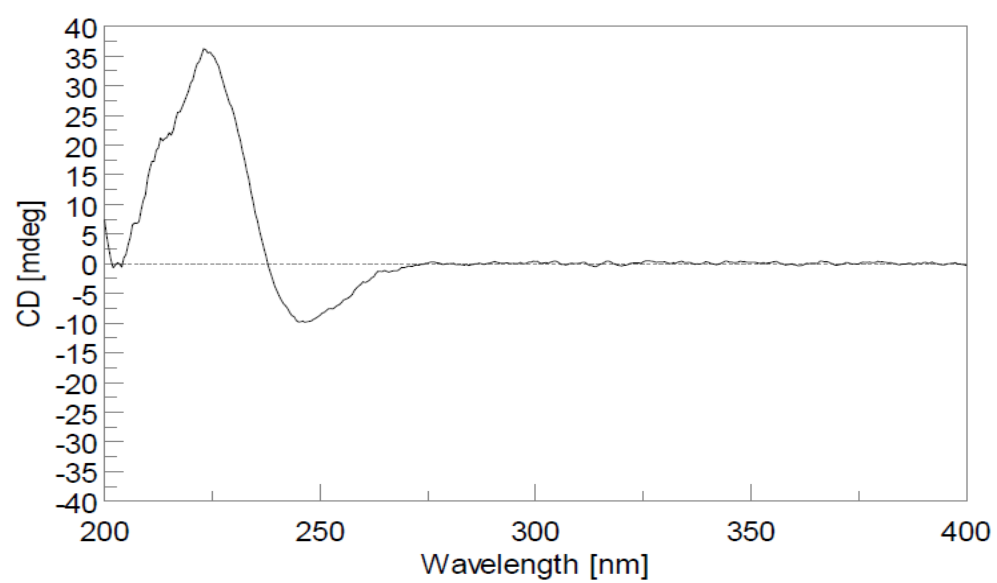

Figure S33: CD spectrum ( $1.6 \times 10^{-4}$  M, MeOH) of isosarcophine (3)
